1           **A new *Brachiaria* reference genome and its application in**  
2           **identifying genes associated with natural variation in tolerance to**  
3           **acidic soil conditions among *Brachiaria* grasses**

4  
5

6 Margaret Worthington<sup>1#</sup>, Juan Guillermo Perez<sup>1</sup>, Saule Mussurova<sup>2</sup>, Alexander Silva-  
7 Cordoba<sup>1</sup>, Valheria Castiblanco<sup>1</sup>, Charlotte Jones<sup>3</sup>, Narcis Fernandez-Fuentes<sup>3</sup>, Leif Skot<sup>3</sup>,  
8 Sarah Dyer<sup>2&</sup>, Joe Tohme<sup>1</sup>, Federica Di Palma<sup>2</sup>, Jacobo Arango<sup>1</sup>, Ian Armstead<sup>3</sup>, Jose J De  
9 Vega<sup>2\*</sup>

10  
11

- 12 1. International Center for Tropical Agriculture (CIAT), A.A. 6713, Cali, Colombia.  
13 2. Earlham Institute, Norwich Research Park, Norwich, NR4 7UZ, UK.  
14 3. Institute of Biological, Environmental and Rural Sciences (IBERS), Aberystwyth  
15 University, Aberystwyth, UK.

16  
17

18 # Present address: Department of Horticulture, University of Arkansas, 306 Plant Sciences  
19 Bldg, Fayetteville, AR, 72701, USA.

20 & Present address: NIAB, Huntingdon Road, Cambridge, CB3 0LE, UK.

21  
22

23 \* Correspondence to [jose.devega@earlham.ac.uk](mailto:jose.devega@earlham.ac.uk); Earlham Institute, Norwich Research  
24 Park, Norwich, NR4 7UZ, UK.

25

## ABSTRACT

26

27 Toxic concentrations of aluminium cations and low phosphorus availability are the main  
28 yield-limiting factors in acidic soils, which represent half of the potentially available arable  
29 land. *Brachiaria* grasses, which are commonly sown as a forage in the tropics because of  
30 their resilience and low demand for nutrients, have a greater tolerance to high  
31 concentrations of aluminium cations than most other grass crops. In this work, we explored  
32 the natural variation in tolerance to aluminium cations between high and low tolerant  
33 *Brachiaria* species and characterised their transcriptional differences during stress. We also  
34 identified three QTLs associated with root vigour during aluminium cation stress in their  
35 hybrid progeny. By integrating these results with a new *Brachiaria* reference genome, we  
36 have identified genes associated with aluminium cation tolerance in *Brachiaria*. We  
37 observed differential expression of response signalling, cell wall composition and vesicle  
38 transport genes homologous to aluminium-induced proteins involved in limiting uptake or  
39 localizing toxic agents. However, there was limited regulation of malate transporters, which  
40 are detected during  $\text{Al}^{3+}$  stress in other grasses. Contrasting regulation during  $\text{Al}^{3+}$  stress of  
41 numerous genes involved in RNA translation suggests variations in response timing may be  
42 associated with the differences in tolerance to aluminium cations among *Brachiaria* species.

43

44

45

## INTRODUCTION

46

47 Acidic soils constitute circa 30 % of the world's total land area and 50 % of the potentially  
48 available arable land (Von Uexküll and Mutert 1995). Acidic soils are particularly  
49 predominant in two regions in the world, a northern “temperate belt” and a southern  
50 “subtropical belt” (Hede, Skovmand, and Lopez Cesati 2001). Therefore, a broad range of  
51 vegetable, cereal and forage crops can be yield-limited in these conditions. While low soil pH  
52 *per se* can have an inhibitory effect on plant growth for non-adapted species, the adverse  
53 effects of soil acidity are mostly associated with several mineral toxicities and deficiencies,  
54 particularly increased concentrations of soluble forms of manganese, iron and aluminium,  
55 and reduced levels of available forms of phosphorus, calcium, magnesium and potassium.  
56 Among these, lower phosphorus solubility and aluminium toxicity are considered the main  
57 limiting factors on productivity (Eswaran, Reich, and Beinroth 1997). As soil pH decreases  
58 below 5, aluminium becomes soluble as the aluminium trivalent cation ( $\text{Al}^{3+}$ ), a form highly  
59 toxic to plants. Soluble  $\text{Al}^{3+}$  effect on root apices results in diminished ion and water uptake.

60

61 Although acid soils can be conditioned for improved agricultural use through the addition of  
62 lime (quicklime, calcium oxide or slag, calcium silicate, etc.), this agronomic practice is  
63 undesirable due to the broader implications for other fauna, flora and the soil microbial  
64 populations and, in general, the best long-term strategy is a combination of agronomic  
65 practices and growing tolerant cultivars. Natural variation in aluminium tolerance has been  
66 identified for a number of crops with rice being the most aluminium-tolerant among the food  
67 staples (Rao et al. 2016). However, all *Brachiaria* species show greater tolerance to  $Al^{3+}$   
68 toxicity than most other grass crops, including maize, rice or wheat (Kochian et al. 2015).

69

70 *Brachiaria* (Trin.) Griseb. (syn. *Urochloa* P.Beauv.) grasses are native to East Africa and are  
71 widely sown as a forage to feed ruminants across the tropics, particularly in areas with  
72 marginal soils. *Brachiaria* has a set of desirable genetic characteristics linked to drought and  
73 waterlogging tolerance, poor and acidic soils tolerance, and resistance to major diseases.  
74 However, *Brachiaria* resilience is principally a result of low demand for soil nutrients (Pizarro  
75 et al. 2013; Worthington and Miles 2015). As a consequence, toxic cation levels (and not  
76 reduced levels of mineral solutes) are the limiting factors on *Brachiaria* species productivity  
77 in acidic soil conditions.

78

79  $Al^{3+}$  tolerance has been established to be a multigenic trait, though major genes can also be  
80 important (Ryan et al. 2009; Kochian et al. 2015). The incomplete transfer of tolerance from  
81 parents to near-isogenic lines in sorghum (Melo et al. 2013), maize (Guimaraes et al. 2014),  
82 and wheat (Johnson, Carver, and Baligar 1997; Tang et al. 2002) supports polygenic  
83 inheritance of  $Al^{3+}$  tolerance. While a single locus in barley (*Alp*) confers significant tolerance  
84 to  $Al^{3+}$  in the elite material (Minella and Sorrells 1992), different loci appear to play an  
85 essential role in Asian landraces (Caniato et al. 2007).

86

87  $Al^{3+}$  tolerance mechanisms are classified as external and internal tolerance mechanisms  
88 (Furlan et al. 2018; Kochian et al. 2015). In the first group, plants prevent  $Al^{3+}$  uptake by  
89 raising the pH in the rhizosphere by  $H^+$  influx or forming binding complexes by exudation of  
90 citrate, malate and oxalate. In the second group,  $Al^{3+}$  is absorbed and localized to cell  
91 organelles or the apoplast. In tolerant rice variety Nipponbare, both exclusion mechanisms  
92 and internal detoxification are important in withstanding toxicity, while primarily internal  
93 detoxification occurs in sensitive rice variety Modan (Roselló et al. 2015).

94

95 Little is known about the genetic basis of the  $Al^{3+}$  tolerance in *Brachiaria*. Nevertheless,  
96 screening experiments have evidenced different but consistent aluminium tolerance among  
97 *Brachiaria* species and cultivars, which indicates the genetic basis of the trait (Arroyave et al.

98 2013). The three most important commercial species, *Brachiaria brizantha* (A.Rich.) Stapf.,  
99 *B. decumbens* Stapf., and *B. humidicola* (Rendle) Schweick exist primarily as apomicts with  
100 varying levels of polyploidy (Valle and Savidan 1996). The sexual species *B. ruziziensis*  
101 (Germ.&C.M.Evrard) is also used in breeding. *B. decumbens* is significantly more tolerant to  
102 Al<sup>3+</sup> than *B. ruziziensis* (Arroyave et al. 2011; Bitencourt et al. 2011).

103

104 *Brachiaria* is one of the most widely used and promising forages in the American and African  
105 tropics and for the potential of this species to be realised, it is important that varieties are  
106 tailored to the particular demands of each environment in which it is grown (Bailey-Serres et  
107 al. 2019). One of the tools available for identifying locally adapted variation is molecular  
108 characterisation. However, underpinning genomic resources are costly to produce and so  
109 often limited for 'orphan' crop species such as *Brachiaria*. To this end, the work presented  
110 here has focused on developing a) genomic resources for *Brachiaria* and b) the application  
111 of these in developing a better understanding of the molecular basis of a key trait affecting  
112 *Brachiaria* productivity, namely Al<sup>3+</sup> tolerance.

113

114

115

## METHODS

116

### 117 **Plant materials and phenotyping**

118

119 The mapping population used in this work consisted of 169 genotypes of F1 progeny from a  
120 cross between the autopolyploid BRX 44-02 (*B. ruziziensis*) and the segmental allopolyploid  
121 CIAT 606 (*B. decumbens*). This population was generated initially to identify markers linked  
122 to apomixis (Worthington et al. 2016). Accessions were phenotyped at CIAT in Cali,  
123 Colombia, and consisted of six cycles where plants were grown for 20 days in hydroponic  
124 solutions with 0 and 200 µM AlCl<sub>3</sub>. Measurements of cumulative root length (RL), root  
125 biomass (RB), and root tip diameter (RD) were taken at the end of each cycle and  
126 transformed to meet the assumption of normality; RL and RB were square-root transformed  
127 and RD was natural log-transformed. The PROC MIXED method in SAS was used to fit a  
128 mixed effect model. Genotypic BLUPs were calculated from stress and control  
129 measurements individually, back transformed BLUP in the natural scale were obtained by  
130 dividing stress and control values for each trait.

131

### 132 **Genome sequencing, assembly and annotation**

133

134 *B. ruziziensis* genotype 26162 ( $2n = 2x = 18$ ) was the source of genomic DNA. Two paired-  
135 end libraries were created and sequenced in Illumina HiSeq 2500 machines in rapid run  
136 mode by the Earlham Institute (approx. 70X) and the Yale Center for Genome Analysis  
137 (approx. 30X) following the manufacturer's protocol. Additionally, a Nextera mate-pair (MP)  
138 library with insert length 7 Kb was sequenced to improve the scaffolding. Read quality was  
139 assessed, and contaminants and adaptors removed. Illumina Nextera MP reads were  
140 required to include a fragment of the adaptor to be used in the following steps (Leggett,  
141 Clavijo, et al. 2013). The pair-end shotgun libraries were assembled and later scaffolded  
142 using the mate-pairs library using Platanus v1.2.117, which is optimized for heterozygous  
143 genomes (Kajitani et al. 2014). We did not use Platanus' gap-closing step. Approximately 1  
144 million Pacbio reads from this same genotype were generated in a PacBio RSII sequencer,  
145 and used for gap filling using PBJelly v.15.8.24 (English et al. 2012). Scaffolds shorter than  
146 1 Kbp were filtered out. We used 31mer spectra analysis to compare the assemblies  
147 produced by different pipelines, as well as our final assembly with the intermediary  
148 assemblies from preceding steps. A K-mer spectrum is a representation of how many fixed-  
149 length words or K-mers (y-axis) appear a certain number of times or coverage (x-axis). The  
150 K-mer counting was performed with KAT (Mapleson et al. 2016). The completeness of the  
151 assembly was checked with BUSCO (Simão et al. 2015).

152

153 Repetitive and low complexity regions of the scaffolds were masked using RepeatMasker  
154 (Tarailo-Graovac and Chen 2009) based on self-alignments and homology with the  
155 RepBase public database and specific databases built with RepeatModeler (Smit and  
156 Hubley 2008). LTR retrotransposons were detected by LTRharvest (Ellinghaus, Kurtz, and  
157 Willhoeft 2008) and classified with RepeatClassifier. The 5' and 3' ends of each LTR were  
158 aligned to each other with MUSCLE (Edgar 2004) and used to calculate the nucleotide  
159 divergence rate with the Kimura-2 parameter using MEGA6 (Tamura et al. 2013). The  
160 insertion time was estimated by assuming an average substitution rate of  $1.3 \times 10^{-8}$   
161 (Schmutz et al. 2014)

162

163 Our annotation pipeline (De Vega et al. 2015) uses four sources of evidence. (a) *De novo*  
164 and genome-guided *ab initio* transcripts deduced from RNA-Seq reads from the *B.*  
165 *ruziziensis* genotype assembled with Trinity (Grabherr et al. 2011) and Tophat and Cufflinks  
166 (Trapnell et al. 2012), (b) gene models predicted by Augustus (Stanke et al. 2006), (c)  
167 homology-based alignments of transcripts and proteins from four close species with  
168 Exonerate and GMAP (Wu et al. 2016), and (d) the repeats annotation. Finally, MIKADO  
169 (Venturini et al. 2018) built the gene models to be compatible with this previous information.  
170 Proteins were compared with the NCBI non-redundant proteins and EBI's InterPro

171 databases and the results were imported into Blast2GO (Conesa et al. 2005) to annotate the  
172 GO and GO slim terms, enzymatic protein codes and KEGG pathways. Proteins were also  
173 functionally annotated with the GO terms of any significant orthologous protein in the  
174 eggNOG database (Powell et al. 2014), using the eggNOG-mapper pipeline (Huerta-Cepas  
175 et al. 2017).

176

## 177 **Population genotyping and genetic map construction**

178

179 Genotyping-by-sequencing libraries were prepared and sequenced for the 169 F1 progenies  
180 and the two parents as described in Worthington et al 2016. Reads were demultiplexed  
181 according to the forward and reverse barcodes used during library preparation with FastGBS  
182 (Torkamaneh et al. 2017) and adaptors and enzymatic motifs removed with Cutadapt (Martin  
183 2011). Reads were aligned to the genome using BWA MEM (Li 2013). SNP calling was done  
184 for each sample with GATK's Haplotypecaller (Van der Auwera et al. 2013) without the  
185 duplicated read filter (-drf DuplicateRead) and recalled for the population with GATK's  
186 GenotypeGVCFs, in both tools with "--ploidy 4". We changed to *missing call* any  
187 homozygous SNP supported by less than 12 reads, and any SNP supported by less than  
188 three reads. We removed any site not called in a progenitor or more than 20 % of the  
189 progeny. Markers that were heterozygous in only one parent and had a segregation ratio of  
190 a heterozygote to homozygote progeny of approximately 2:1 (between 0.5 and 1.75) were  
191 classified as single-dose allele (SDA) markers and used in the linkage map construction.  
192 Separated genetic linkage maps of BRX 44-02 and CIAT 606 were constructed in JoinMap  
193 v5; downstream QTL analysis used the *B. ruziziensis* BRX 44-02 map.

194

## 195 **RNA-seq sequencing and analysis**

196

197 The tolerance experiment in the greenhouse was fully replicated once. RNA extraction from  
198 each root and leaf sample was performed with RNeasy Plant Mini kit (Qiagen, CA, USA) and  
199 sent to the sequencing service provider where Illumina RNA-seq libraries were prepared and  
200 sequenced using the HiSeq 2500 platform. Sixteen libraries were independently generated  
201 and sequenced (two tissues, from two species, in two conditions, in two replicates).  
202 Contaminations in the raw data were discarded with Kontaminant (Leggett, Ramirez-  
203 Gonzalez, et al. 2013) against a database of common virus, bacteria and fungi. Adaptors  
204 were removed with Cutadapt (Martin 2011) and quality checked with FastQC (Andrews  
205 2017). Reads were mapped to the genome using STAR (Dobin et al. 2013) and the gene  
206 models annotation for guidance. Counts were estimated with Stringtie (Pertea et al. 2015).  
207 We used DEseq v2 (Love, Huber, and Anders 2014) for analysing differential expression,

208 which takes as input a matrix of read counts mapped to each gene. Enriched GO terms and  
209 other categories in each group of differentially expressed genes were identified in R using  
210 TOPGO (Alexa and Rahnenfuhrer 2010) using a Fisher's test (FDR<0.05) and the  
211 "weight01" algorithm. The relation among GO terms was plotted in R using ggplot (Wickham  
212 and Chang 2008).

213

## 214 **Comparative genomics**

215

216 Syntenic blocks between *B. ruziziensis* and *S. italica* whole genomes were identified with  
217 Minimap (Li 2016), and plotted with D-GENIES (Cabanettes and Klopp 2018). Previously,  
218 we had filtered out any scaffolds shorter than 10Kbp that did not contain any gene. The  
219 assembly was anchored in *S. italica* by assigning each scaffold to the chromosome position  
220 where it had the longest alignment chain after combining proximal alignments. For  
221 clustering, proteins from five related species were assigned to eggNOG orthologous groups  
222 as before. A phylogenetic tree based on these data was built with MUSCLE, as before, by  
223 aligning the orthologous proteins from two species at a time, filtering sets with 1:1 ratios and,  
224 finally, estimating the nucleotide divergence rate using MEGA v6, as before.

225

226

227

## RESULTS

228

### 229 **Root morphology in *Brachiaria* species in different aluminium cation concentrations**

230

231 We demonstrated the superior Al<sup>3+</sup> tolerance of *B. decumbens* accession CIAT 606  
232 compared with *B. ruziziensis* accession BRX 44-02 (Fig. 1). The root morphology in the *B.*  
233 *decumbens* accession was less affected than in the *B. ruziziensis* accessions after growing  
234 for 20 days in control and high (200 µM) Al<sup>3+</sup> concentration hydroponic solutions. Under  
235 stress conditions, the roots of *B. decumbens* were over three times as long and had twice  
236 the biomass of *B. ruziziensis*. However, the root top diameter increased in stress conditions  
237 in a similar ratio in both species (Suppl. Table 1).

238

239 A population of 169 interspecific tetraploid progeny was obtained by crossing aluminium-  
240 tolerant *B. decumbens* accession CIAT 606 and aluminium-sensitive *B. ruziziensis*  
241 accession BRX 44-02. The interspecific progeny showed variation in cumulative root length  
242 (RL), root biomass (RB), and root tip diameter (RD) (Fig 2; Suppl. File 1). We obtained



243 highly significant ( $p < 0.001$ ) genotypic differences in stress/control, control and stress  
244 conditions for the three traits (RL, RB and RD).

245

246

## 247 **Assembly and annotation of a *Brachiaria* reference genome**

248

249 We selected the *B. ruziziensis* genotype CIAT 26162 ( $2n = 2x = 18$ ) as the source of  
250 genomic DNA. This is a semi-erect diploid accession from Burundi (-3.1167, 30.1333) that  
251 was chromosome-doubled with colchicine to produce the autotetraploid *B. ruziziensis* BRX  
252 44-02, one of the progenitors of the interspecific mapping population analysed. The ploidy of  
253 CIAT 26162 has recently been verified by cytogenetics (*P. Tomaszewska, personal comm.*).  
254 A whole-genome was assembled (WGS) using Platanus v.1.2.4 (Kajitani et al. 2014), from  
255 Illumina paired-end and Nextera mate-pair reads with a coverage of approximately 100X and  
256 7X, respectively (Suppl. Table 2). Platanus outperformed the contiguity results obtained with  
257 other pipelines. Although the combination of ABySS for the contigs assembly and SOAP2 for  
258 the scaffolding resulted in a larger assembly, a kmer frequency analysis (Mapleson et al.  
259 2016) evidenced that the additional content was repeated under collapsed heterozygosity  
260 that Platanus had purged (Suppl. Fig. 1). The assembly was followed by a gap-filling step  
261 using approximately 1 million Pacbio reads with an average length of 4.8 Kbp, which  
262 resulted in a reduced percentage of ambiguous nucleotides (Ns) from 17.45 % to 11.39 %.  
263 We finally discarded all the sequences under 1 Kbp to produce the reference genome we  
264 used for the downstream analysis (Table 1). To assess the completeness of the assembly,  
265 we verified that 1,345 (93.4 %) of the 1,440 BUSCO orthologous genes (Simão et al. 2015)  
266 were present in the assembly; 1,216 of which were completed and in a single copy, 32 were  
267 duplicated, and 97 were fragmented. This WGS assembly is deposited in SRA with the  
268 accession number GCA\_003016355. The raw reads are deposited in the Bioproject  
269 PRJNA437375.

270

271 The repeat content (Suppl. Table 3) was 51 % of the total genome (656,355,643 bp, after  
272 excluding Ns), which is close to the 46 % repeat content in *Setaria italica* (L.) P. Beauv  
273 (foxtail millet) (Zhang et al. 2012). We found a large number of Gypsy and Copia long  
274 terminal repeats (LTRs), which represent 24 % and 9.5 % of the total genome excluding Ns.  
275 These transposons and proportions are also very similar to those observed in foxtail millet.  
276 We compared the divergence between the flanking tails in the LTRs (Suppl. Fig. 2) and  
277 identified a single very recent burst of LTR Gypsy activity around 0.6 MYA (Kimura =  
278  $0.042 \pm 0.026$ ) and of LTR Copia also around 0.6 MYA (Kimura =  $0.041 \pm 0.027$ ). Other  
279 repeat elements, including LINEs (Long Interspersed Nuclear Elements), simple repeat



280 patterns of the sequence, satellites, and transposons were much less common, except for  
281 En/Spm DNA transposons observed in 4.2 % of the genome.

282

283 We annotated 42,232 coding genes, which included 42,359 predictive open reading frames  
284 (ORFs), as well as 875 non-coding genes without a predicted ORF (Suppl. file 2). Together  
285 these transcripts and non-coding genes define 43,234 targets for the expression analysis.  
286 35,982 of the coding transcripts had a homologous protein in the NCBI non-redundant (*nr*)  
287 database. In 58% of the cases, the top hit was a *S. italica* sequence (Suppl. Fig. 3). Among  
288 those 35,982, 33,963 were functionally annotated with at least one GO term, and 39,488 had  
289 an InterPro annotation. We also identified the best reciprocal hit with *A. thaliana*, rice, *P.*  
290 *halli*, *S. italica* and *S. viridis*; and the top homologous in Uniprot (Suppl. File 3).

291

292

### 293 **Comparative genomics with related grasses**

294

295 Firstly, we aligned the transcripts and proteins from five sequenced species in the same  
296 clade, *S. italica*, *S. viridis* (L.) Beauv. (green foxtail), *Zea mays* L. (maize), *Panicum halli*  
297 Vasey and *P. virgatum* L. (switchgrass); and found that on average 78 % and 72 % of the  
298 transcripts and proteins aligned with an identity over 0.7, respectively (Suppl. Table 4).

299

300 We could assign 35,831 *Brachiaria* proteins to an eggNOG orthologous group (Powell et al.  
301 2014), and 13,570 proteins could be further annotated with GO terms from the eggNOG  
302 database. We also assigned the proteins from other species in the Poaceae family to these  
303 eggNOG orthologous groups in order to identify shared clusters of proteins among these  
304 species. 24,752 of the total 26,354 clusters of proteins defined for Poaceae (poaVIR) in the  
305 eggNOG database could be found in at least one of the studied species, around 70 %  
306 common to the tribe Paniceae that includes *Setaria* and *Panicum* species, and around 60 %  
307 to all these five species in the subfamily Panicoideae (Suppl. File 4; Suppl. Fig. 4). More  
308 than 70% of the clusters of proteins had double or triple the number of proteins than other  
309 species because of relatively recent whole-genome duplication events. Around 85 % of the  
310 cluster in *S. italica*, *S. viridis* or *P. halli* contained only one protein from these species (Suppl.  
311 Table 5). The proportion is lower in *B. ruziziensis* and *Z. mays* and 20 % of the clusters had  
312 two proteins in both species. From this analysis, we also estimated that there are  
313 approximately two thousand proteins in other close species that are missed in our *Brachiaria*  
314 assembly.

315

316 We estimated the divergence between these species based on the Kimura divergence  
317 values between orthologous proteins in 6,450 clusters of proteins with one member from  
318 each species (*P. virgatum* was excluded from this analysis). The average Kimura divergence  
319 value for pairs of coding sequences of *B. ruziziensis* with *S. italica* was  $0.094 \pm 0.007$ , with  
320 *Panicum hallii* was  $0.102 \pm 0.007$ , with *S. viridis* was  $0.095 \pm 0.006$ , and with maize was  
321  $0.163 \pm 0.008$  (Suppl. Fig. 5). By assuming an average substitution rate of two-times  
322 (diploid)  $1.3 \times 10^{-8}$  (Schmutz et al. 2014), we estimated that *Brachiaria* diverged from the  
323 other Paniceae, *Setaria* and *Panicum*, around 13.4-15.5 million years ago (MYA), while the  
324 split of the Paniceae clades took place around 23.8-26.3 MYA (Suppl. Fig. 6).

325

326 The 23,076 scaffolds in the WGS longer than 10 Kbp or with at least one annotated gene  
327 (533.9 Mbp) were aligned in *S. italica* nine chromosomes, the closest relative with a high  
328 quality sequenced genome (Zhang et al. 2012). Up to 21,145 of the 23,076 scaffolds  
329 (91.6 %), which comprise 525.1 Mbp could be aligned (Fig 3; Suppl. file 5). Furthermore, this  
330 allowed us to assign chromosomal positions to 41,830 coding genes (41,974 transcripts)  
331 contained in these anchored sequences (Suppl. File 6). We identified 59 synteny blocks, 36  
332 of which were longer than 1 Mbp in both species (Fig 3). There were three large  
333 translocations when comparing the *S. italica* and *B. ruziziensis* genomes between  
334 chromosomes 1 and 7, 2 and 6, as well as 3 and 5. And four inversions (smaller than the  
335 translocations) between tails in chromosomes 1 and 4 (both ends), 2 and 9 (proximal end),  
336 and 2 and 3 (proximal end).

337

338

### 339 **QTL mapping in the interspecific *B. ruziziensis* X *B. decumbens* population**

340

341 Between 78.8 and 91.5 % of the Genotyping-by-sequencing (GBS) reads from the 169  
342 interspecific progeny and the progenitors' samples could be aligned in the assembly. After  
343 filtering, there was an average of 81,831 SNPs and 15,595 indels sites per sample. In total,  
344 799,155 sites were called in the population. These sites were 85.7 % SNPs, 6.3 %  
345 insertions, 7.2 % deletions, 0.3 % mixed (a combination of SNPs and indels), and 0.5 %  
346 complex (expanding more than one bp). In agreement with filtering criteria previously tested  
347 in tetraploid *Brachiaria* samples (Worthington et al. 2016), we used SNPs only, and required  
348 at least 12 reads to call a homozygous site in any sample, a minimum allele frequency of  
349 5 % and calls missing in less than 20 % of the samples. After filtering, 15,074 SNP sites  
350 were homozygous in the *B. ruziziensis* progenitor and heterozygous in the *B. decumbens*  
351 progenitor (nnxnp; Joinmap segregation descriptor, see Methods), 4,891 sites heterozygous  
352 in the *B. ruziziensis* progenitor and homozygous in the *B. decumbens* progenitor (lmxll), and

353 1,652 were heterozygous in both progenitors (h<sub>x</sub>h<sub>x</sub>). We classified 4,817 n<sub>x</sub>n<sub>p</sub> and 1,252  
354 l<sub>m</sub>x<sub>l</sub> sites as single dose alleles (SDAs, or “simplex”) based on their  
355 heterozygous/homozygous segregation ratio and used them as markers in the genetic map  
356 construction. The final genetic map included 4,427 markers placed at LOD 10 in 18 linkage  
357 groups (Suppl. Fig. 7, Suppl. File 7), which corresponds with the number of chromosomes  
358 expected in a tetraploid *Brachiaria* population such as this one. Linkage groups had an  
359 average length of 74.7 ± 22.7 cM. Based on the position of each SNP site in the genome,  
360 two linkage groups, relating to two homoeologous chromosomes, matched to each  
361 assembled chromosome (pseudomolecule), which were numbered following the order in *S.*  
362 *italica* (Suppl. Table 6). We also aligned the scaffolds in the genetic map to compare the co-  
363 linearity between the position of each marker in the genetic map and genome assembly  
364 (Suppl. Fig. 8).

365

366 As stated above, RL, RB and RD were scored in the interspecific population in control and  
367 Al<sup>3+</sup> stress conditions. We also calculated the ratio between both conditions. 371 markers  
368 had marker/trait association LODs over 3, 273 markers in LG1, 73 markers in LG4, 51  
369 markers in LG3, and 12, two and one in LGs 13, 10 and 5. 212 WGS scaffolds contained at  
370 least one marker with LOD over 3 (Suppl. File 7).

371

372 To identify well supported QTL, we focused on peaks with several consecutive significant  
373 markers based on a rolling average (window 3) LOD score over 4 (Fig. 4; Suppl. Fig. 9). This  
374 identified three QTLs each in LG 1 (Chr 8) for root length and biomass, LG 3 (Chr 7) for root  
375 length, and LG 4 (Chr 3) for root diameter. QTLs explained from 12.8 % to 16.1% of the  
376 phenotypic variance (Suppl. File 7). In a previous publication (Worthington et al. 2016), this  
377 population was phenotyped for reproductive mode (apomictic or sexual) using differential  
378 interference contrast (DIC) microscopy and the QTL mapped into Chromosome 1. Indeed,  
379 the apomictic locus (APO) was found again in LG7 (Chr 1), as previously reported  
380 (Worthington et al. 2019).

381

382 The peaks with the highest LOD values were observed in LG1 (Chr 8). A closer look  
383 evidenced several consecutive peaks in this QTL supported by both root length and biomass  
384 phenotypes. QTLs in the proximal region of the chromosome peaked at 7 cM (LOD 4.73)  
385 and 14.3 cM (LOD 4.95). An additional larger QTL is specific to control conditions peaked  
386 three times around 20.2-23.4, 25.7-26.2 and 27.6-28.8 cM, with the highest values at 26 cM  
387 for root length (LOD 5.8) and at 25.8 cM for root biomass (LOD 5.25). The QTL on LG 4  
388 (Chr 3) peaked around 57.4-59 cM (LOD 4.3). The QTL in LG3 (Chr 7) showed two peaks at  
389 96.8 cM for root length (LOD 4.75) and 79.7 cM for root diameter (LOD 4.02).

390

391 QTL regions contained 839 differentially expressed (DE) genes, of which 87 were  
392 differentially expressed (DE) (Suppl. file 8). Among the 87 differentially expressed genes in  
393 the QTL regions, 39 were in QTL in LG1, 17 were in the QTL in LG3, and 31 were in QTL in  
394 LG4. A total of 35 of the 87 genes were annotated as components of membrane, 18 were  
395 annotated as involved in response regulation, and 37 as binding to different molecular  
396 compounds, including ATP/ADP/GTP (12) and metal ions (9) and DNA (8). Only 12 of the 87  
397 genes were not annotated with at least one of these previous GO terms. However, 17 of the  
398 87 genes were uncharacterised proteins and not annotated with GO terms. All but six of  
399 these 17 had homologous proteins in the related grass species. All three QTL regions  
400 contained genes annotated in all the previous GO terms in approximately equal proportions.

401

402

### 403 **Transcriptional differences during stress between *Brachiaria* species**

404

405 We performed RNA-seq from stem and root tissue samples extracted from the *B.*  
406 *decumbens* and *B. ruziziensis* progenitors after growing for three days in control or high (200  
407  $\mu\text{M}$   $\text{AlCl}_3$ ) aluminium cation concentration hydroponic solutions. We also incorporated a  
408 reference-based reanalysis of public RNA-seq data (PRJNA314352) of the aluminium-  
409 resistant *B. decumbens* var. Basilisks roots (referred to as “Basilisks” in this paper, while *B.*  
410 *decumbens* always refers to cultivar CIAT 606) screened using the same experimental  
411 conditions and treatments as employed by us (Salgado et al. 2017).

412

413 When the normalised counts for all the genes were used to cluster the samples, these  
414 clusters firstly grouped by tissue, secondly by genotype, and thirdly by treatment (Suppl. Fig.  
415 10). As a consequence, the following results comparing control against stress treatment are  
416 presented according to species and tissue. There were 5,421 DE genes in total, with most of  
417 these differentially regulated in a single genotype and tissue (Suppl. Fig. 11). Among these,  
418 5102 were DE in roots only, 249 in stems only, and 70 in both tissues. Up to 116 of the DE  
419 genes were non-coding (without a clear ORF).

420

421 4,423 of the 5,102 genes DE in roots were specific to one of the species (Fig. 5). We  
422 obtained twice as many DE genes in *B. ruziziensis* as in the other two species. The  
423 proportion of DE genes specific to only one species was maintained when considering up-  
424 and down-regulated genes separately. The most substantial overlaps between gene sets  
425 were between *B. ruziziensis* and *B. decumbens*, with 178 genes up-regulated and 154 gene  
426 down-regulated in both. 86 genes were up-regulated genes in both *B. decumbens* cv. CIAT

427 606 and cv. Basilisks, and 67 genes were up-regulated in Basilisks but down-regulated in *B.*  
428 *ruzizensis*.

429

430 Enrichment analysis of the GO terms over-represented among DE genes in each species  
431 allowed us to identify the biological processes (BP) and molecular functions (MF) that are  
432 similarly or differently regulated among them (Suppl. File 9 and 10). After annotating the  
433 genes with the full set of GO terms as described previously, we simplified the results to “GO  
434 slim” terms for this analysis. “GO slim” contains the subset of higher-level terms from the GO  
435 resource (Fig. 6, sorted left to right from high to low tolerance to Al<sup>3+</sup> toxic levels; Statistical  
436 analysis in Suppl. Table 7).

437

438 There was little overlap among GO terms based on the DE genes included in each  
439 annotation, as represented in a correlation matrix plot (Suppl. Fig. 12). The exception is the  
440 overlap between five MF terms related to RNA/mRNA/rRNA binding with the ribosome  
441 (MF:3723, 3729, 19843; and 3735 and 5198) among themselves and with two BP terms,  
442 namely “translation” and “ribonucleoprotein complex assembly” (BP: 6412, 22618). All these  
443 terms were significantly enriched among down-regulated genes in *B. ruzizensis* and *B.*  
444 *decumbens*, but were not enriched in Basilisks. The number of genes was much larger in *B.*  
445 *ruzizensis* (146 genes) than *B. decumbens* or Basilisks (39 and 16 genes, respectively).  
446 Most of these genes were annotated as ribosomal RPS/RPL proteins.

447

448 Despite little overlap among gene sets, the number of enriched GO terms was similar  
449 between different species. The exception to this observation was “ion binding” and the  
450 translation-related GO terms in *B. ruzizensis*.

451

452 Genes annotated as “transmembrane transporters” (MF:22857) were highly over-  
453 represented (Fisher’s test values in Suppl. Table 7) among up-regulated DE genes in all  
454 three species (57 in Basilisks, 44 in *B. decumbens* and 70 in *B. ruzizensis*). This annotation  
455 was also highly represented among down-regulated DE genes in Basilisks (16 genes).  
456 However, only two were common to the three species, a MST3 sugar transporter (Gene  
457 1766G4) and 8448G4, a STAR1/ALS1 aluminium-induced transmembrane ABC transporter  
458 (Huang et al. 2009). While most of these genes were DE in only one of the species (only 21  
459 were shared between any two species), they appear to cover similar roles in all three  
460 species as “ABC transporters”, “P-type ATPases” and “Amino acid transporters”. As  
461 commented before, there was a minimal overlap between this GO term (MF:22857) and the  
462 “transmembrane transport” BP term (BP:55085), which was only enriched in Basilisks and  
463 includes a small number of proteins (seven in Basilisk and *B. ruzizensis*, and three in *B.*

464 *decumbens*). Most of these proteins were annotated as mitochondrial transporters, but three  
465 of the 7 Basilisks-specific DE genes were annotated as tonoplast and vacuolar transporters  
466 induced by abiotic stress and involved in functions “critical for pH homeostasis” (Genes  
467 211G30, 211G34 and 751G28).

468

469 Four functions were regulated in *B. ruziziensis* differently than in the other species (Fig. 6),  
470 “cell wall organization and biogenesis” (BP:71554), transport (BP:6810), ion binding  
471 (MF:43167) and glycosyl hydrolase activity (MF:16757). The “biosynthetic process” term  
472 (BP:9058) was enriched in both down-regulated and up-regulated DE genes in *B. ruziziensis*  
473 (Suppl. Fig. 13).

474

475 “Cell wall organization and biogenesis” included 51 down-regulated DE genes in *B.*  
476 *ruziziensis*, while included only 14/17 up-regulated DE genes in the other species. Most of  
477 these in either species were peroxidases PER and expansin proteins induced by various  
478 plant hormones (ethylene, GA, auxin, etc.) and involved in toxic removal during oxidative  
479 stress (Kochian et al. 2015).

480

481 “Transport” was enriched among up-regulated genes in *B. decumbens* and down-regulated  
482 genes in *B. ruziziensis*, and not enriched in Basilisks. It included 83, 35 and 12 DE genes in  
483 *B. ruziziensis*, *B. decumbens* and Basilisks, respectively. In all species, these proteins were  
484 localizing different substances (phosphate, sodium, mRNA, etc.) to various cell organelles.  
485 Only two genes were common to *B. ruziziensis* and *B. decumbens* and so regulated in  
486 opposite ways: a manganese metal-binding intracellular transporter involved in root  
487 development (7811G2) and a GTP-binding protein involved in nucleocytoplasmic transport  
488 (14972G2). Up-regulated genes in *B. decumbens* were also up-regulated in *B. ruziziensis*,  
489 but with lower values of fold-change expressions. Exceptionally, six of the 35 exhibited high  
490 fold-changes in both species. These highlighted DE genes were involved in phospholipids,  
491 phosphate, magnesium, auxin, nitrate and miRNA transport in the cell (Genes 6944G2,  
492 12087G2, 8068G4, 26018G2, 4534G2, 2708G4).

493

494 “Ion binding” was only enriched in *B. ruziziensis* (100 up-regulated genes), though 44 and 26  
495 DE genes in *B. decumbens* and Basilisks, respectively, were also up-regulated in those  
496 species. Ten genes were DE in both *B. decumbens* and *B. ruziziensis* with functions, such  
497 as “nitrate assimilation” (26018G2 -again- and 122G16), “phospholipid translocation”  
498 (6944G2 again), and “phytic acid -phosphorus storage- trafficking” (87018G2 and 89122G2).

499



500 “Glycosyl hydrolase” was enriched among down-regulated genes in *B. ruzizensis* (39  
501 genes), but among up-regulated genes in both *B. decumbens* and Basilisks (18 and 24  
502 genes, respectively). Again, there was little overlap among these gene sets. In *B.*  
503 *ruzizensis*, ten of the 39 down-regulated genes were associated with different “defense  
504 response”. The same proportion was observed among up-regulated *B. decumbens* and  
505 Basilisks genes. There was overlap between “Glycosyl hydrolase” and “carbohydrate  
506 metabolism” (BP:5975) (Suppl Fig. 13), which, in principle, shows the same enrichment  
507 pattern, down-regulated in *B. ruzizensis* (42 genes) but up-regulated in the other species  
508 (24 and 21 genes in Basilisks and *B. decumbens*, respectively). However, “carbohydrate  
509 metabolism” (BP:5975) was also enriched among down-regulated DE genes in Basilisks (13  
510 genes). Similar specific GO terms and pathways were enriched in either up- or down-  
511 regulated genes, such as “hemicellulose metabolic process”, xyloglucan metabolism,  
512 glycoside hydrolases, “sucrose degradation” pathways.

513

514 Two GO terms, “oxidoreductase activity” (MF:16491) and “small molecule metabolism”  
515 (BP:44281) were enriched in both up-regulated and down-regulated genes in Basilisks (69  
516 and 29 genes, respectively), but, in both cases, were only enriched among down-regulated  
517 genes in *B. ruzizensis* and *B. decumbens* (Suppl. Fig. 13). There were fewer up-regulated  
518 genes in these species than in Basilisks.

519

520

521

## DISCUSSION

522

523 **Forward genetics and newly produced genomic resources to identify candidate loci**  
524 **for abiotic stress tolerance**

525

526 The negative effects of soil acidity on crop production are essentially associated with  
527 different mineral toxicities and deficiencies. Aluminium cation toxicity has long been  
528 established to be the single most important limiting factor associated with acidic soil  
529 productivity (Eswaran, Reich, and Beinroth 1997).

530

531 All *Brachiaria* species show some tolerance to Al<sup>3+</sup> toxicity, particularly compared with other  
532 grasses such as wheat, rice and maize (Kochian et al. 2015; Arroyave et al. 2013). While  
533 most crops reduce root growth to 50 % when exposed to 5 μM Al<sup>3+</sup>, *Brachiaria* species need  
534 to be exposed to up to 35 μM to exhibit a reduced root growth of 25 % (Poschenrieder et al.  
535 2008).



536

537 Natural plant adaptation to acid soils can be measured by estimating root vigour in low pH  
538 soils and resistance to high concentrations of  $\text{Al}^{3+}$  (Wenzl et al. 2006). In our experiment, *B.*  
539 *decumbens*-CIAT606 root morphology was less affected than *B. ruziziensis*-BRX4404 after  
540 growing for 3 and 20 days in control and high 200  $\mu\text{M}$   $\text{Al}^{3+}$  concentration hydroponic  
541 solutions, for tissue sampling (RNA-seq analysis) and phenotyping (QTL analysis),  
542 respectively. In our differential expression analysis, we have compared low tolerant or  
543 sensitive (*B. ruziziensis* BRX 44-02), intermediate (*B. decumbens* cv. CIAT 606) and high  
544 tolerant or resistant (*B. decumbens* cv. Basilisks) accessions by including in the work a  
545 reanalysis of the *B. decumbens* basilisk RNA-seq data from Salgado *et al.* (2017), which  
546 was produced under the same experimental conditions as ours but did not use a reference  
547 genome. As a comparison, in a 21-day long term study using a similar screening, four *B.*  
548 *decumbens* and four *B. ruziziensis* genotypes showed intermediate tolerance of  $\text{Al}^{3+}$ , one  
549 *B. ruziziensis* genotype was sensitive, and only the *B. decumbens* cultivar Basilisk was  
550 unaffected by high  $\text{Al}^{3+}$  (Bitencourt et al. 2011). Interestingly, Furlan *et al.* (2018) recently  
551 reported a higher  $\text{Al}^{3+}$  tolerance in *B. brizantha* cv. Xaraes than in *B. decumbens* cv.  
552 Basilisks.

553

554 We contrasted *B. ruziziensis* and *B. decumbens* hybrid progeny to understand their  
555 differences in tolerance further. We measured adaptive roots traits to soils with toxic  
556 concentrations of aluminium and identified QTLs for all the root traits scored and segregating  
557 in the interspecific population. The three QTLs we identified were not large effect (LOD  
558 scores under 6) but were observed for several root traits. Also, they may not have been  
559 directly related to aluminium resistant but more to general root vigour. In future work, it will  
560 be interesting to see if these QTLs are also associated with drought tolerance, since this trait  
561 is also affected by root architecture (Uga et al. 2013). Our results integrating QTLs and  
562 differential expression analysis highlighted the importance of membrane transport (including  
563 metal ions), regulation and signalling (binding to DNA), and energy (carbohydrate  
564 metabolism and binding to ATP/ADP/GTP) molecular mechanisms. The most aluminium-  
565 tolerant *Brachiaria*, cultivar Xaraes, accumulated the largest concentration of aluminium in  
566 roots. How *B. decumbens* avoids the apoplastic binding of  $\text{Al}^{3+}$ , as other resistant crops do,  
567 remains unknown. However, both tolerant cultivars, Xaraes and Basilisk, kept oxidative  
568 stress lower than other genotypes under increasing  $\text{Al}^{3+}$  concentrations (Furlan et al. 2018).

569

570 We are also making publicly available the genome assembly and gene annotation of a  
571 diploid *Brachiaria ruziziensis*. This genome provides a necessary platform for genomic  
572 approaches for trait improvement. Our transcriptomic study and comparative genomics

573 analysis are examples of its utility. We opted for a non-polyploid diploid accession because  
574 *Brachiaria* grasses are heterozygous outcrossing species. While tetraploid *B. ruziziensis* are  
575 the main accessions used for breeding new hybrids, artificially induced doubled diploids  
576 allow the generation of hybrid sexual progeny which increases the available genetic  
577 diversity (Worthington and Miles 2015; Simioni and do Valle 2009). This genome is the  
578 diploid accession that was chromosome-doubled with colchicine to produce the  
579 autotetraploid *B. ruziziensis* progenitor of the interspecific population analysed.

580

581 The assembly was partially scaffolded to pseudomolecule level using a genetic map which  
582 contained approximately 5,000 markers. This genetic map had previously been assembled  
583 without a reference genome (Worthington et al. 2016), but a higher number of markers could  
584 be sorted using this new reference. Long reads will improve this assembly and allow for  
585 polyploid genome references in the near future. Because of the limited number of markers,  
586 almost all the scaffolds were also placed on the high-quality *S. italica* genome. While we  
587 identified three large chromosomal transpositions (Chromosomes 5, 6 and 7), gene order on  
588 all pairs of chromosomes was highly conserved between the two species as previously  
589 observed (Worthington et al. 2016) and as might be predicted from species diverging only  
590 13-15 MYA.

591

592

### 593 **Differentially expressed genes associated with tolerance to Al<sup>3+</sup> in *Brachiaria***

594

595 Aluminium tolerance mechanisms are classified as external exclusion or internal tolerance  
596 mechanisms (Kochian et al. 2015; Furlan et al. 2018). Internal tolerance mechanisms  
597 involve either modification of the properties of the root cell wall, or the uptake and  
598 sequestration of Al<sup>3+</sup> once it enters the plant (Kochian et al. 2015). Ramos *et al.* (2012)  
599 observed that *B. decumbens* accumulated Al<sup>3+</sup> in the mucilage layer of root apices, which  
600 reduced the quantity of Al<sup>3+</sup> reaching the cell wall and crossing the plasma membrane.  
601 Arroyave *et al.* (2013) suggested that the presence of a complex exodermis in *B.*  
602 *decumbens*, that is absent in *B. ruziziensis*, may contribute to a more efficient exclusion of  
603 Al<sup>3+</sup>. On the other hand, a higher concentration of root pectin measured in *B. ruziziensis*  
604 during stress can evidence increased apoplastic aluminium binding (Horst, Wang, and  
605 Eticha 2010). Changes in the structural properties of cell wall carbohydrates are mediated by  
606 expansins, endo- $\beta$ -1,4-glucanases, xyloglucan transferases and hydrolases (XTH) (e.g.  
607 AtXTH31 and AtXTH15) and pectin methylesterases (Yang et al. 2011; Kochian et al. 2015).  
608 Contrasting regulation, as evidenced by differences in enriched GO terms between *B.*  
609 *decumbens* and *B. ruziziensis* suggest *B. decumbens* adaptations may be associated with

610 xyloglucan transferring (GO:16762) and oxidation (GO:52716). This contrasting enrichment  
611 was largely due to 12 differentially expressed XTH proteins that are down-regulated during  
612 stress in *B. ruziziensis*, but not in *B. decumbens*. One of them (5400G2) is in the QTL region  
613 in LG1. There are three additional differentially expressed XTH proteins that are up-  
614 regulated: 5233G2 (AtXTH23) only in *B. decumbens*, and 6544G2 (AtXTH32) and 11683G4  
615 (AtXTH27), which are up-regulated in both *B. decumbens* and *B. ruziziensis*. Among the 20  
616 non-DE XTH proteins in the genome, these showed the highest homology to XTH31  
617 (554G10, 99G28) and XTH15 (385G24). The *Brachiaria* gene with closest homology to  
618 SLK2 (1984G2) is upregulated in both *B. ruziziensis* and *B. decumbens*, but only DE in *B.*  
619 *decumbens*. AtSLK2 is involved in cell wall pectin methylesterification in response to Al<sup>3+</sup>  
620 stress (Geng et al. 2017). The “glycosyl hydrolase” GO term was enriched by down-  
621 regulated genes in *B. ruziziensis* (39 genes), but by up-regulated genes in both *B.*  
622 *decumbens* and *Basilisks* (18 and 24 genes, respectively).

623

624 Once Al<sup>3+</sup> has entered the root, the uptake and sequestration of Al<sup>3+</sup> includes molecular  
625 binding and eventually compartmentation of the toxic substance. ALS (Aluminium Sensitive)  
626 transporters and NRAM metal ion transporters have been proposed as keystones in Al<sup>3+</sup>  
627 localization to the tonoplast and other cell organelles, and away from the sensitive root tips  
628 in *A. thaliana* and rice (Larsen et al. 2007; Huang, Yamaji, and Ma 2010; Huang et al. 2012).  
629 Notably, an NRAM aluminium transporter (NRAT1) localized in the plasma membrane  
630 appears to be expressly involved in storing Al<sup>3+</sup> in root vacuoles in rice and maize (Xia et al.  
631 2010; Guimaraes et al. 2014). In *Brachiaria*, we identified 21 NRAM proteins. However, only  
632 three of them were DE: a gene that with homology to OsTITANIA (AtOBE3/ATT1), which is  
633 transcription factor (2499G8) that functions as a regulator of NRAM and other metal  
634 transporter genes (Tanaka et al. 2018) and two of the three *Brachiaria* proteins showing  
635 close homology to OsNRAT1, 3672G6 and 30107G2. These were, significantly up-regulated  
636 in both *B. decumbens* and *B. ruziziensis* during stress. The third gene, with close homology  
637 to OsNRAT1, was not DE (1881G2). Eight genes in the *Brachiaria* genome are homologous  
638 to ALS1 and annotated as aluminum-induced ABC transporters, but only gene 3096G6 was  
639 DE in *B. ruziziensis*. However, it was not-significantly up-regulated in *B. decumbens*.

640

641 In rice, the complex formed by STAR1 and STAR2/AtALS3 (Sensitive To Aluminium  
642 Rhizotoxicity) is involved in aluminium-induced alterations of the cell wall composition  
643 related to less aluminium-binding in the apoplast (Huang, Yamaji, and Ma 2010; Huang et al.  
644 2009). These ABC transporters appear to mediate the efflux of UDP-glucose into the cell  
645 wall, which could alter the cell wall composition and lead to a reduction in Al-binding capacity  
646 (Kochian et al. 2015). Fifteen proteins had homology to STAR/ALS in *Brachiaria*, but only

647 two were DE: gene 8448G4 had closest homology with OsSTAR1 and gene 7361G2 with  
648 OsSTAR2 and AtALS3. STAR1/STAR2 were up-regulated in both *B. ruziziensis* and *B.*  
649 *decumbens*. Over 150 genes annotated with the “transmembrane transporters” GO term  
650 (MF:22857) were highly overrepresented among up-regulated DE genes in all three species  
651 (57 in Basilisks, 44 in *B. decumbens* and 70 in *B. ruziziensis*), and two were common to the  
652 three species: a MST3 sugar transporter (Gene 1766G4) and the previously highlighted  
653 STAR1/ALS1 (8448G4).

654

655 Most aluminium tolerant crops additionally rely on external restriction to prevent the uptake  
656 of aluminium and its entry into the root cells through the release of anionic organic acids in  
657 the rhizosphere that chelate the  $Al^{3+}$  (Rao et al. 2016; Kochian et al. 2015). However,  
658 *Brachiaria* appears to not rely on secreted organic acids since no clear relation between  
659 aluminium-induced organic acid efflux from roots and resistance could be established, there  
660 was no difference in secreted organic acids between tolerant and resistant *Brachiaria*  
661 species (Wenzl et al. 2001; Arroyave et al. 2013). Furthermore, tolerant *B. decumbens*  
662 accessions secreted 3-30 times less organic acids than sensitive species such as maize and  
663 wheat (Wenzl et al. 2001; Arroyave et al. 2018). However, while *B. decumbens* citrate  
664 exudation was about 200 times lower than that observed in aluminium-tolerant rice, the  
665 same study evidenced high oxalate exudation in *B. decumbens* roots, but only between 24  
666 and 36 hours after exposure to the toxic concentration (Arroyave et al. 2018). It appears that  
667 other mechanisms of resistance overshadow the impact of root exudation. The lack of  
668 correlation between exudation and resistance has also been observed in rice (Famoso et al.  
669 2010; Ma et al. 2002).

670

671 Two families of membrane transporters, aluminium-activated malate transporter (ALMT) and  
672 the multidrug and toxic compound extrusion (MATE) family, are responsible for plasma  
673 membrane malate and citrate efflux, respectively (Raman et al. 2005; Guimaraes et al. 2014;  
674 Rao et al. 2016). Citrate is a much stronger chelating agent for  $Al^{3+}$  than malate (Ma 2000).  
675 In rice, FRDL4 is responsible for aluminium-induced citrate efflux required for external  
676 detoxification (Yokosho, Yamaji, and Ma 2011). In *Brachiaria*, we identified three citrate  
677 transporters MATE proteins, which could be characterised as FRDL (Ferric Reductase  
678 Defective Like) proteins, 61G2 in *B. decumbens*, and 259G14 and 675G12 in both *B.*  
679 *decumbens* and *B. ruziziensis*. All 3 were differentially upregulated with large fold-changes,  
680 particularly 675G12.

681

682 Given their role in  $Al^{3+}$  tolerance in other grasses, we identified thirteen aluminium-activated  
683 malate transporters (AMLTs) in the genome. However, only two were differentially

684 expressed: 11634G4 was up-regulated 4.74 fold-change during stress in *B. decumbens*, and  
685 462G24 was down-regulated 2.35 fold-change in *B. ruziziensis*. We identified a cluster with  
686 three contiguous non-DE AMLTs (5136G2, 5136G4 and 5136G6) in scaffold 5136 (LG3:  
687 71.83-72.95 cM) around 10 cM from the QTL. This is consistent with the observation that  
688 copy-number variation of ALMT correlated with aluminium resistance in rye and maize  
689 (Collins et al. 2008; Maron et al. 2013). However, a more precise understanding of the  
690 discrepancies between the early 24-to-36 hours “alarm phase” and the long-term resistance  
691 mechanisms would be necessary to understand the role of aluminium-activated malate  
692 transporters and citrate efflux in *Brachiaria*.

693

694 C<sub>2</sub>H<sub>2</sub>-type zinc-finger transcription factors STOP1 (ART1 in rice) and STOP2 regulate  
695 aluminium-induced expression of several MATE and ALMT genes in Arabidopsis and rice  
696 (Iuchi et al. 2007; Yamaji et al. 2009; Kobayashi et al. 2014). We identified three genes with  
697 homology to AtSTOP1, one was DE in *B. ruziziensis* (29G2) and another two (3833G12 and  
698 243G34) which were not DE. We also identified two genes with homology to AtSTOP2, both  
699 were upregulated with high fold-change in *B. ruziziensis* and *B. decumbens* (126G26 and  
700 1615G2). All five had homology with OsART1, the STOP1 homolog in rice, which up-  
701 regulated at least 31 genes in an Al-dependent manner, including STAR1, FRDL, NRAMP  
702 proteins (Yamaji et al. 2009; Kochian et al. 2015).

703

704

705

## CONCLUSION

706

707 In this work we present a comprehensive analysis of the molecular mechanism linked to  
708 aluminium tolerance in *Brachiaria* species. Phenotypic studies on root development allowed  
709 us to identify genotypes that present tolerance to aluminium. By sequencing, assembly and  
710 annotating a diploid genotype of *Brachiaria ruziziensis* we have developed the capability for  
711 genomic-based studies of desirable phenotypic traits. Using this resource, we have identified  
712 three QTLs associated to root vigour that were followed up/complemented by  
713 transcriptomic profiling of a range of 3 contrasting genotypes subject to aluminium stress  
714 treatments. We have identified a number of genes and molecular responses that impact on  
715 different aspects of signalling, cell-wall composition and active transports as response to  
716 aluminium stress. We found that external mechanisms such sequestration of Al<sup>3+</sup> common in  
717 other grasses might be not that important in *Brachiaria* and that among different *Brachiaria*  
718 species the timing and intensity of the response can explain the different levels of tolerance.  
719 Finally, the newly annotated draft genome represents an important base upon which study  
720 other aspects of *Brachiaria* biology.

721  
722  
723  
724  
725  
726  
727  
728  
729  
730  
731  
732  
733  
734  
735  
736  
737  
738  
739  
740  
741  
742  
743  
744  
745  
746  
747  
748  
749  
750  
751  
752  
753  
754  
755  
756  
757

## REFERENCES

- Alexa, Adrian, and Jorg Rahnenfuhrer. 2010. 'topGO: enrichment analysis for gene ontology', *R package version*, 2: 2010.
- Andrews, Simon. 2017. "FastQC: a quality control tool for high throughput sequence data. 2010." In.
- Arroyave, Catalina, Juan Barceló, Charlotte Poschenrieder, and Roser Tolrà. 2011. 'Aluminium-induced changes in root epidermal cell patterning, a distinctive feature of hyperresistance to Al in *Brachiaria decumbens*', *Journal of inorganic biochemistry*, 105: 1477-83.
- Arroyave, Catalina, Roser Tolrà, Livia Chaves, Marcelo Claro de Souza, Juan Barceló, and Charlotte Poschenrieder. 2018. 'A proteomic approach to the mechanisms underlying activation of aluminium resistance in roots of *Urochloa decumbens*', *Journal of inorganic biochemistry*, 181: 145-51.
- Arroyave, Catalina, Roser Tolrà, Thanh Thuy, Juan Barceló, and Charlotte Poschenrieder. 2013. 'Differential aluminum resistance in *Brachiaria* species', *Environmental and experimental botany*, 89: 11-18.
- Bailey-Serres, Julia, Jane E Parker, Elizabeth A Ainsworth, Giles ED Oldroyd, and Julian I Schroeder. 2019. 'Genetic strategies for improving crop yields', *Nature*, 575: 109-18.
- Bitencourt, Gislayne de Araujo, Lucimara Chiari, Valdemir Antônio Laura, Cacilda Borges do Valle, Liana Jank, and José Roberto Moro. 2011. 'Aluminum tolerance on genotypes of signal grass', *Revista Brasileira de Zootecnia*, 40: 245-50.
- Cabanettes, Floréal, and Christophe Klopp. 2018. 'D-GENIES: dot plot large genomes in an interactive, efficient and simple way', *PeerJ*, 6: e4958.
- Caniato, FF, CT Guimaraes, RE Schaffert, VMC Alves, LV Kochian, A Borém, PE Klein, and JV Magalhaes. 2007. 'Genetic diversity for aluminum tolerance in sorghum', *Theoretical and Applied Genetics*, 114: 863-76.
- Collins, NC, NJ Shirley, Muhammad Saeed, Margaret Pallotta, and JP Gustafson. 2008. 'An ALMT1 gene cluster controlling aluminum tolerance at the Alt4 locus of rye (*Secale cereale* L.)', *Genetics*, 179: 669-82.
- Conesa, Ana, Stefan Götz, Juan Miguel García-Gómez, Javier Terol, Manuel Talón, and Montserrat Robles. 2005. 'Blast2GO: a universal tool for annotation, visualization and analysis in functional genomics research', *Bioinformatics*, 21: 3674-76.
- De Vega, Jose J, Sarah Ayling, Matthew Hegarty, Dave Kudrna, Jose L Goicoechea, Åshild Ergon, Odd A Rognli, Charlotte Jones, Martin Swain, and Rene Geurts. 2015. 'Red clover (*Trifolium pratense* L.) draft genome provides a platform for trait improvement', *Scientific reports*, 5: 17394.



- 758 Dobin, Alexander, Carrie A Davis, Felix Schlesinger, Jorg Drenkow, Chris Zaleski, Sonali  
759 Jha, Philippe Batut, Mark Chaisson, and Thomas R Gingeras. 2013. 'STAR: ultrafast  
760 universal RNA-seq aligner', *Bioinformatics*, 29: 15-21.
- 761 Edgar, Robert C. 2004. 'MUSCLE: multiple sequence alignment with high accuracy and high  
762 throughput', *Nucleic acids research*, 32: 1792-97.
- 763 Ellinghaus, David, Stefan Kurtz, and Ute Willhoeft. 2008. 'LTRharvest, an efficient and  
764 flexible software for de novo detection of LTR retrotransposons', *BMC bioinformatics*,  
765 9: 18.
- 766 English, Adam C, Stephen Richards, Yi Han, Min Wang, Vanesa Vee, Jiaxin Qu, Xiang Qin,  
767 Donna M Muzny, Jeffrey G Reid, and Kim C Worley. 2012. 'Mind the gap: upgrading  
768 genomes with Pacific Biosciences RS long-read sequencing technology', *PloS one*,  
769 7: e47768.
- 770 Eswaran, H, P Reich, and F Beirnoth. 1997. 'Global distribution of soils with acidity', *Plant-  
771 Soil interactions at low pH*: 159-64.
- 772 Famoso, Adam N, Randy T Clark, Jon E Shaff, Eric Craft, Susan R McCouch, and Leon V  
773 Kochian. 2010. 'Development of a novel aluminum tolerance phenotyping platform  
774 used for comparisons of cereal aluminum tolerance and investigations into rice  
775 aluminum tolerance mechanisms', *Plant physiology*, 153: 1678-91.
- 776 Furlan, Felipe, Lucelia Borgo, Flávio Henrique Silveira Rabêlo, Monica Lanzoni Rossi,  
777 Adriana Pinheiro Martinelli, Ricardo Antunes Azevedo, and José Lavres. 2018.  
778 'Aluminum-induced stress differently modifies Urochloa genotypes responses on  
779 growth and regrowth: root-to-shoot Al-translocation and oxidative stress', *Theoretical  
780 and Experimental Plant Physiology*, 30: 141-52.
- 781 Geng, Xiaoyu, Walter J Horst, John F Golz, Joanne E Lee, Zhaojun Ding, and Zhong-Bao  
782 Yang. 2017. 'LEUNIG \_ HOMOLOG transcriptional co-repressor mediates aluminium  
783 sensitivity through PECTIN METHYLESTERASE 46-modulated root cell wall pectin  
784 methylesterification in Arabidopsis', *The Plant Journal*, 90: 491-504.
- 785 Grabherr, Manfred G, Brian J Haas, Moran Yassour, Joshua Z Levin, Dawn A Thompson,  
786 Ido Amit, Xian Adiconis, Lin Fan, Raktima Raychowdhury, and Qiandong Zeng.  
787 2011. 'Full-length transcriptome assembly from RNA-Seq data without a reference  
788 genome', *Nature biotechnology*, 29: 644.
- 789 Guimaraes, Claudia T, Christiano C Simoes, Maria Marta Pastina, Lyza G Maron, Jurandir V  
790 Magalhaes, Renato CC Vasconcellos, Lauro JM Guimaraes, Ubiraci GP Lana,  
791 Carlos FS Tinoco, and Roberto W Noda. 2014. 'Genetic dissection of Al tolerance  
792 QTLs in the maize genome by high density SNP scan', *BMC genomics*, 15: 153.
- 793 Hede, AR, B Skovmand, and J Lopez Cesati. 2001. "Acid soils and aluminum toxicity.  
794 Application of Physiology in Wheat Breeding." In.



- 795 Horst, Walter J, Yunxia Wang, and Dejene Eticha. 2010. 'The role of the root apoplast in  
796 aluminium-induced inhibition of root elongation and in aluminium resistance of plants:  
797 a review', *Annals of Botany*, 106: 185-97.
- 798 Huang, Chao Feng, Naoki Yamaji, Namiki Mitani, Masahiro Yano, Yoshiaki Nagamura, and  
799 Jian Feng Ma. 2009. 'A bacterial-type ABC transporter is involved in aluminum  
800 tolerance in rice', *The Plant Cell*, 21: 655-67.
- 801 Huang, Chao-Feng, Naoki Yamaji, and Jian Feng Ma. 2010. 'Knockout of a bacterial-type  
802 ATP-binding cassette transporter gene, AtSTAR1, results in increased aluminum  
803 sensitivity in Arabidopsis', *Plant physiology*, 153: 1669-77.
- 804 Huang, Chao-Feng, Naoki Yamaji, Zhichang Chen, and Jian Feng Ma. 2012. 'A  
805 tonoplast-localized half-size ABC transporter is required for internal detoxification of  
806 aluminum in rice', *The Plant Journal*, 69: 857-67.
- 807 Huerta-Cepas, Jaime, Kristoffer Forslund, Luis Pedro Coelho, Damian Szklarczyk, Lars Juhl  
808 Jensen, Christian von Mering, and Peer Bork. 2017. 'Fast genome-wide functional  
809 annotation through orthology assignment by eggNOG-mapper', *Molecular biology  
810 and evolution*, 34: 2115-22.
- 811 Iuchi, Satoshi, Hiroyuki Koyama, Atsuko Iuchi, Yasufumi Kobayashi, Sadako Kitabayashi,  
812 Yuriko Kobayashi, Takashi Ikka, Takashi Hirayama, Kazuo Shinozaki, and  
813 Masatomo Kobayashi. 2007. 'Zinc finger protein STOP1 is critical for proton  
814 tolerance in Arabidopsis and coregulates a key gene in aluminum tolerance',  
815 *Proceedings of the National Academy of Sciences*, 104: 9900-05.
- 816 Johnson, James P, Brett F Carver, and VC Baligar. 1997. 'Expression of aluminum tolerance  
817 transferred from Atlas 66 to hard winter wheat', *Crop Science*, 37: 103-08.
- 818 Kajitani, Rei, Kouta Toshimoto, Hideki Noguchi, Atsushi Toyoda, Yoshitoshi Ogura, Miki  
819 Okuno, Mitsuru Yabana, Masayuki Harada, Eiji Nagayasu, and Haruhiko Maruyama.  
820 2014. 'Efficient de novo assembly of highly heterozygous genomes from whole-  
821 genome shotgun short reads', *Genome research*, 24: 1384-95.
- 822 Kobayashi, Yuriko, Yoshinao Ohyama, Yasufumi Kobayashi, Hiroki Ito, Satoshi Iuchi, Miki  
823 Fujita, Cheng-Ri Zhao, Tazib Tanveer, Markkandan Ganesan, and Masatomo  
824 Kobayashi. 2014. 'STOP2 activates transcription of several genes for Al-and low pH-  
825 tolerance that are regulated by STOP1 in Arabidopsis', *Molecular plant*, 7: 311-22.
- 826 Kochian, Leon V, Miguel A Piñeros, Jiping Liu, and Jurandir V Magalhaes. 2015. 'Plant  
827 adaptation to acid soils: the molecular basis for crop aluminum resistance', *Annual  
828 Review of Plant Biology*, 66: 571-98.
- 829 Larsen, Paul B, Jesse Cancel, Megan Rounds, and Vanessa Ochoa. 2007. 'Arabidopsis  
830 ALS1 encodes a root tip and stele localized half type ABC transporter required for  
831 root growth in an aluminum toxic environment', *Planta*, 225: 1447.

- 832 Leggett, Richard M, Bernardo J Clavijo, Leah Clissold, Matthew D Clark, and Mario  
833 Caccamo. 2013. 'NextClip: an analysis and read preparation tool for Nextera Long  
834 Mate Pair libraries', *Bioinformatics*, 30: 566-68.
- 835 Leggett, Richard Mark, Ricardo Humberto Ramirez-Gonzalez, Bernardo Clavijo, Darren  
836 Waite, and Robert Paul Davey. 2013. 'Sequencing quality assessment tools to  
837 enable data-driven informatics for high throughput genomics', *Frontiers in genetics*,  
838 4: 288.
- 839 Li, Heng. 2013. 'Aligning sequence reads, clone sequences and assembly contigs with  
840 BWA-MEM', *arXiv preprint arXiv:1303.3997*.
- 841 ———. 2016. 'Minimap and minimap: fast mapping and de novo assembly for noisy long  
842 sequences', *Bioinformatics*, 32: 2103-10.
- 843 Love, Michael I, Wolfgang Huber, and Simon Anders. 2014. 'Moderated estimation of fold  
844 change and dispersion for RNA-seq data with DESeq2', *Genome biology*, 15: 550.
- 845 Ma, Jian Feng. 2000. "Role of organic acids in detoxification of aluminum in higher plants."  
846 In.
- 847 Ma, Jian Feng, Renfang Shen, Zhuqing Zhao, Matthias Wissuwa, Yoshinobu Takeuchi,  
848 Takeshi Ebitani, and Masahiro Yano. 2002. 'Response of rice to Al stress and  
849 identification of quantitative trait loci for Al tolerance', *Plant and Cell Physiology*, 43:  
850 652-59.
- 851 Mapleson, Daniel, Gonzalo Garcia Accinelli, George Kettleborough, Jonathan Wright, and  
852 Bernardo J Clavijo. 2016. 'KAT: a K-mer analysis toolkit to quality control NGS  
853 datasets and genome assemblies', *Bioinformatics*, 33: 574-76.
- 854 Maron, Lyza G, Claudia T Guimarães, Matias Kirst, Patrice S Albert, James A Birchler, Peter  
855 J Bradbury, Edward S Buckler, Alison E Coluccio, Tatiana V Danilova, and David  
856 Kudrna. 2013. 'Aluminum tolerance in maize is associated with higher MATE1 gene  
857 copy number', *Proceedings of the National Academy of Sciences*, 110: 5241-46.
- 858 Martin, Marcel. 2011. 'Cutadapt removes adapter sequences from high-throughput  
859 sequencing reads', *EMBnet. journal*, 17: 10-12.
- 860 Melo, Janaina O, Ubiraci GP Lana, Miguel A Piñeros, Vera MC Alves, Claudia T Guimarães,  
861 Jiping Liu, Yi Zheng, Silin Zhong, Zhangjun Fei, and Lyza G Maron. 2013.  
862 'Incomplete transfer of accessory loci influencing Sb MATE expression underlies  
863 genetic background effects for aluminum tolerance in sorghum', *The Plant Journal*,  
864 73: 276-88.
- 865 Minella, Euclides, and Mark E Sorrells. 1992. 'Aluminum tolerance in barley: genetic  
866 relationships among genotypes of diverse origin', *Crop Science*, 32: 593-98.

- 867 Perteua, Mihaela, Geo M Perteua, Corina M Antonescu, Tsung-Cheng Chang, Joshua T  
868 Mendell, and Steven L Salzberg. 2015. 'StringTie enables improved reconstruction of  
869 a transcriptome from RNA-seq reads', *Nature biotechnology*, 33: 290.
- 870 Pizarro, Esteban A, Michael D Hare, Mpenzi Mutimura, and Bai Changjun. 2013. 'Brachiaria  
871 hybrids: potential, forage use and seed yield', *Tropical Grasslands-Forrajes*  
872 *Tropicales*, 1: 31-35.
- 873 Poschenrieder, Charlotte, Benet Gunsé, Isabel Corrales, and Juan Barceló. 2008. 'A glance  
874 into aluminum toxicity and resistance in plants', *Science of the total environment*,  
875 400: 356-68.
- 876 Powell, Sean, Kristoffer Forslund, Damian Szklarczyk, Kalliopi Trachana, Alexander Roth,  
877 Jaime Huerta-Cepas, Toni Gabaldon, Thomas Rattei, Chris Creevey, and Michael  
878 Kuhn. 2014. 'eggNOG v4. 0: nested orthology inference across 3686 organisms',  
879 *Nucleic acids research*, 42: D231-D39.
- 880 Raman, Harsh, Kerong Zhang, Mehmet Cakir, Rudi Appels, David F Garvin, Lyza G Maron,  
881 Leon V Kochian, J Sergio Moroni, Rosy Raman, and Muhammad Imtiaz. 2005.  
882 'Molecular characterization and mapping of ALMT1, the aluminium-tolerance gene of  
883 bread wheat (*Triticum aestivum* L.)', *Genome*, 48: 781-91.
- 884 Rao, Idupulapati M, John W Miles, Stephen E Beebe, and Walter J Horst. 2016. 'Root  
885 adaptations to soils with low fertility and aluminium toxicity', *Annals of Botany*, 118:  
886 593-605.
- 887 Roselló, Maite, Charlotte Poschenrieder, Benet Gunse, Juan Barceló, and Mercè Llugany.  
888 2015. 'Differential activation of genes related to aluminium tolerance in two  
889 contrasting rice cultivars', *Journal of inorganic biochemistry*, 152: 160-66.
- 890 Ryan, Peter R, Harsh Raman, Sanjay Gupta, Walter J Horst, and Emmanuel Delhaize.  
891 2009. 'A second mechanism for aluminum resistance in wheat relies on the  
892 constitutive efflux of citrate from roots', *Plant physiology*, 149: 340-51.
- 893 Salgado, Leonardo Rippel, Rodolpho Lima, Bruno Ferreira dos Santos, Karina Tamie  
894 Shirakawa, Mariane de Almeida Vilela, Nalvo Franco Almeida, Rodrigo Matheus  
895 Pereira, Alexandre Lima Nepomuceno, and Lucimara Chiari. 2017. 'De novo RNA  
896 sequencing and analysis of the transcriptome of signalgrass (*Urochloa decumbens*)  
897 roots exposed to aluminum', *Plant Growth Regulation*, 83: 157-70.
- 898 Schmutz, Jeremy, Phillip E McClean, Sujun Mamidi, G Albert Wu, Steven B Cannon, Jane  
899 Grimwood, Jerry Jenkins, Shengqiang Shu, Qijian Song, and Carolina Chavarro.  
900 2014. 'A reference genome for common bean and genome-wide analysis of dual  
901 domestications', *Nature genetics*, 46: 707.

- 902 Simão, Felipe A, Robert M Waterhouse, Panagiotis Ioannidis, Evgenia V Kriventseva, and  
903 Evgeny M Zdobnov. 2015. 'BUSCO: assessing genome assembly and annotation  
904 completeness with single-copy orthologs', *Bioinformatics*, 31: 3210-12.
- 905 Simioni, Carine, and Cacilda Borges do Valle. 2009. 'Chromosome duplication in *Brachiaria*  
906 (A. Rich.) Stapf allows intraspecific crosses', *Crop Breeding & Applied Biotechnology*,  
907 9.
- 908 Smit, Arian FA, and Robert Hubley. 2008. 'RepeatModeler Open-1.0', Available from  
909 <http://www.repeatmasker.org>.
- 910 Stanke, Mario, Oliver Keller, Irfan Gunduz, Alec Hayes, Stephan Waack, and Burkhard  
911 Morgenstern. 2006. 'AUGUSTUS: ab initio prediction of alternative transcripts',  
912 *Nucleic acids research*, 34: W435-W39.
- 913 Tamura, Koichiro, Glen Stecher, Daniel Peterson, Alan Filipinski, and Sudhir Kumar. 2013.  
914 'MEGA6: molecular evolutionary genetics analysis version 6.0', *Molecular biology*  
915 *and evolution*, 30: 2725-29.
- 916 Tanaka, Nobuhiro, Shimpei Uruguchi, Masataka Kajikawa, Akihiro Saito, Yoshihiro Ohmori,  
917 and Toru Fujiwara. 2018. 'A rice PHD-finger protein Os TITANIA, is a growth  
918 regulator that functions through elevating expression of transporter genes for multiple  
919 metals', *The Plant Journal*, 96: 997-1006.
- 920 Tang, Y, David F Garvin, LV Kochian, ME Sorrells, and Brett F Carver. 2002. 'Physiological  
921 genetics of aluminum tolerance in the wheat cultivar Atlas 66', *Crop Science*, 42:  
922 1541-46.
- 923 Tarailo-Graovac, Maja, and Nansheng Chen. 2009. 'Using RepeatMasker to identify  
924 repetitive elements in genomic sequences', *Current protocols in bioinformatics*, 25:  
925 4.10. 1-4.10. 14.
- 926 Torkamaneh, Davoud, Jérôme Laroche, Maxime Bastien, Amina Abed, and François Belzile.  
927 2017. 'Fast-GBS: a new pipeline for the efficient and highly accurate calling of SNPs  
928 from genotyping-by-sequencing data', *BMC bioinformatics*, 18: 5.
- 929 Trapnell, Cole, Adam Roberts, Loyal Goff, Geo Pertea, Daehwan Kim, David R Kelley,  
930 Harold Pimentel, Steven L Salzberg, John L Rinn, and Lior Pachter. 2012.  
931 'Differential gene and transcript expression analysis of RNA-seq experiments with  
932 TopHat and Cufflinks', *Nature protocols*, 7: 562.
- 933 Uga, Yusaku, Kazuhiko Sugimoto, Satoshi Ogawa, Jagadish Rane, Manabu Ishitani, Naho  
934 Hara, Yuka Kitomi, Yoshiaki Inukai, Kazuko Ono, and Noriko Kanno. 2013. 'Control  
935 of root system architecture by DEEPER ROOTING 1 increases rice yield under  
936 drought conditions', *Nature genetics*, 45: 1097.

- 937 Valle, Cacilda Borges do, and Yves H Savidan. 1996. 'Genetics, cytogenetics, and  
938 reproductive biology of Brachiaria.' in (Centro Internacional de Agricultura Tropical  
939 (CIAT)).
- 940 Van der Auwera, Geraldine A, Mauricio O Carneiro, Christopher Hartl, Ryan Poplin,  
941 Guillermo Del Angel, Ami Levy-Moonshine, Tadeusz Jordan, Khalid Shakir, David  
942 Roazen, and Joel Thibault. 2013. 'From FastQ data to high-confidence variant calls:  
943 the genome analysis toolkit best practices pipeline', *Current protocols in*  
944 *bioinformatics*, 43: 11.10. 1-11.10. 33.
- 945 Venturini, Luca, Shabhonam Caim, Gemy George Kaithakottil, Daniel Lee Mapleson, and  
946 David Swarbreck. 2018. 'Leveraging multiple transcriptome assembly methods for  
947 improved gene structure annotation', *GigaScience*, 7: giy093.
- 948 Von Uexküll, HR, and E Mutert. 1995. 'Global extent, development and economic impact of  
949 acid soils', *Plant and soil*, 171: 1-15.
- 950 Wenzl, Peter, Adriana Arango, Alba L Chaves, Maria E Buitrago, Gloria M Patino, John  
951 Miles, and Idupulapati M Rao. 2006. 'A greenhouse method to screen  
952 brachiariagrass genotypes for aluminum resistance and root vigor', *Crop Science*, 46:  
953 968-73.
- 954 Wenzl, Peter, Gloria M Patino, Alba L Chaves, Jorge E Mayer, and Idupulapati M Rao. 2001.  
955 'The high level of aluminum resistance in signalgrass is not associated with known  
956 mechanisms of external aluminum detoxification in root apices', *Plant physiology*,  
957 125: 1473-84.
- 958 Wickham, Hadley, and Winston Chang. 2008. 'ggplot2: An implementation of the Grammar  
959 of Graphics', *R package version 0.7*, URL: [http://CRAN.R-project.org/package=](http://CRAN.R-project.org/package=ggplot2)  
960 [ggplot2](http://CRAN.R-project.org/package=ggplot2), 3.
- 961 Worthington, M, Masumi Ebina, Naoki Yamanaka, Christopher Heffelfinger, Constanza  
962 Quintero, Yeny Patricia Zapata, Juan Guillermo Perez, Michael Selvaraj, Manabu  
963 Ishitani, and Jorge Duitama. 2019. 'Translocation of a parthenogenesis gene  
964 candidate to an alternate carrier chromosome in apomictic Brachiaria humidicola',  
965 *BMC genomics*, 20: 41.
- 966 Worthington, M, Christopher Heffelfinger, Diana Bernal, Constanza Quintero, Yeny Patricia  
967 Zapata, Juan Guillermo Perez, Jose De Vega, John Miles, Stephen Dellaporta, and  
968 Joe Tohme. 2016. 'A parthenogenesis gene candidate and evidence for segmental  
969 allopolyploidy in apomictic Brachiaria decumbens', *Genetics*, 203: 1117-32.
- 970 Worthington, ML, and John W Miles. 2015. 'Reciprocal full-sib recurrent selection and tools  
971 for accelerating genetic gain in apomictic Brachiaria.' in, *Molecular breeding of forage*  
972 *and turf* (Springer).

- 973 Wu, Thomas D, Jens Reeder, Michael Lawrence, Gabe Becker, and Matthew J Brauer.  
974 2016. 'GMAP and GSNAP for genomic sequence alignment: enhancements to  
975 speed, accuracy, and functionality.' in, *Statistical Genomics* (Springer).
- 976 Xia, Jixing, Naoki Yamaji, Tomonari Kasai, and Jian Feng Ma. 2010. 'Plasma membrane-  
977 localized transporter for aluminum in rice', *Proceedings of the National Academy of  
978 Sciences*, 107: 18381-85.
- 979 Yamaji, Naoki, Chao Feng Huang, Sakiko Nagao, Masahiro Yano, Yutaka Sato, Yoshiaki  
980 Nagamura, and Jian Feng Ma. 2009. 'A zinc finger transcription factor ART1  
981 regulates multiple genes implicated in aluminum tolerance in rice', *The Plant Cell*, 21:  
982 3339-49.
- 983 Yang, Jian Li, Xiao Fang Zhu, You Xiang Peng, Cheng Zheng, Gui Xin Li, Yu Liu, Yuan Zhi  
984 Shi, and Shao Jian Zheng. 2011. 'Cell wall hemicellulose contributes significantly to  
985 aluminum adsorption and root growth in Arabidopsis', *Plant physiology*, 155: 1885-  
986 92.
- 987 Yokosho, Kengo, Naoki Yamaji, and Jian Feng Ma. 2011. 'An Al-inducible MATE gene is  
988 involved in external detoxification of Al in rice', *The Plant Journal*, 68: 1061-69.
- 989 Zhang, Gengyun, Xin Liu, Zhiwu Quan, Shifeng Cheng, Xun Xu, Shengkai Pan, Min Xie,  
990 Peng Zeng, Zhen Yue, and Wenliang Wang. 2012. 'Genome sequence of foxtail  
991 millet (*Setaria italica*) provides insights into grass evolution and biofuel potential',  
992 *Nature biotechnology*, 30: 549.  
993

994 **Figure 1:** Root growth in *B. decumbens* accession CIAT606 and *B. ruziziensis* accession  
995 BRX4404 after growing for 20 days in control and high 200  $\mu\text{M}$   $\text{Al}^{3+}$  concentration hydroponic  
996 solutions.

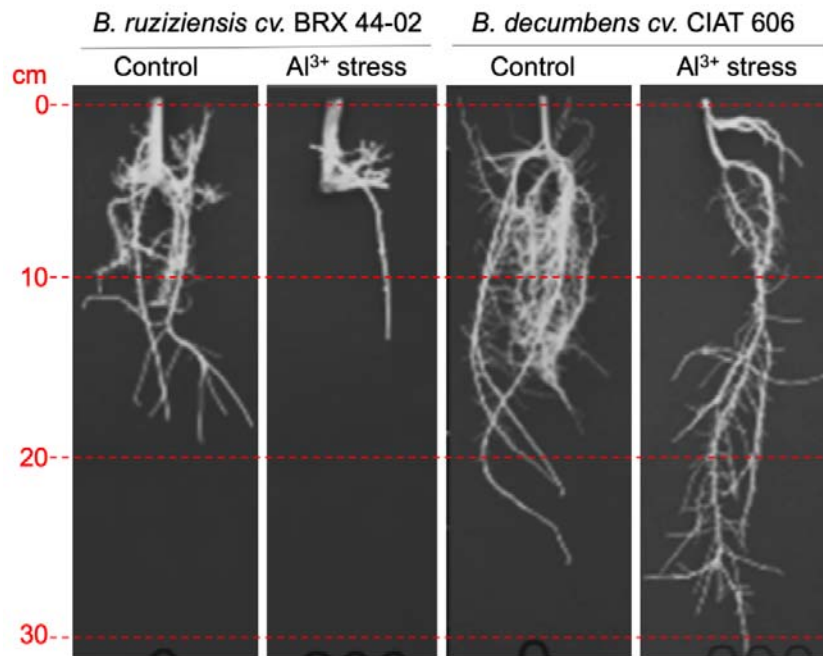

997

998



999 **Figure 2:** Root length (RL), root biomass (RB), and root tip diameter (RD) ratios between  
1000  $Al^{3+}$  stress and control measured values (stress/control) in the interspecific progeny between  
1001 *B. ruzizensis* and *B. decumbens* (n=169).

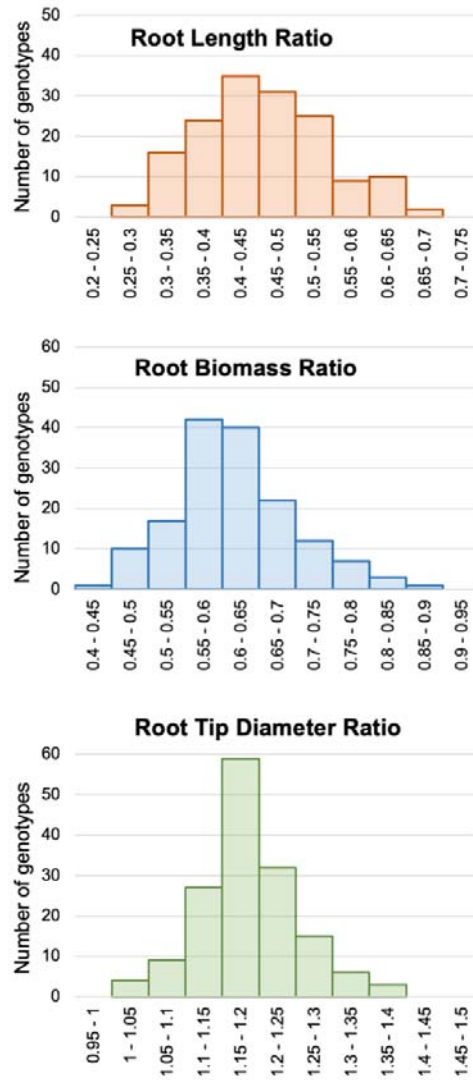

1002

1003 **Figure 3:** Synteny between the *Brachiaria ruziziensis* and *Setaria italica* genomes. The 36  
1004 synteny blocks longer than 1 Mbp and the translocation are highlighted in red or green  
1005 boxes according to their direction.

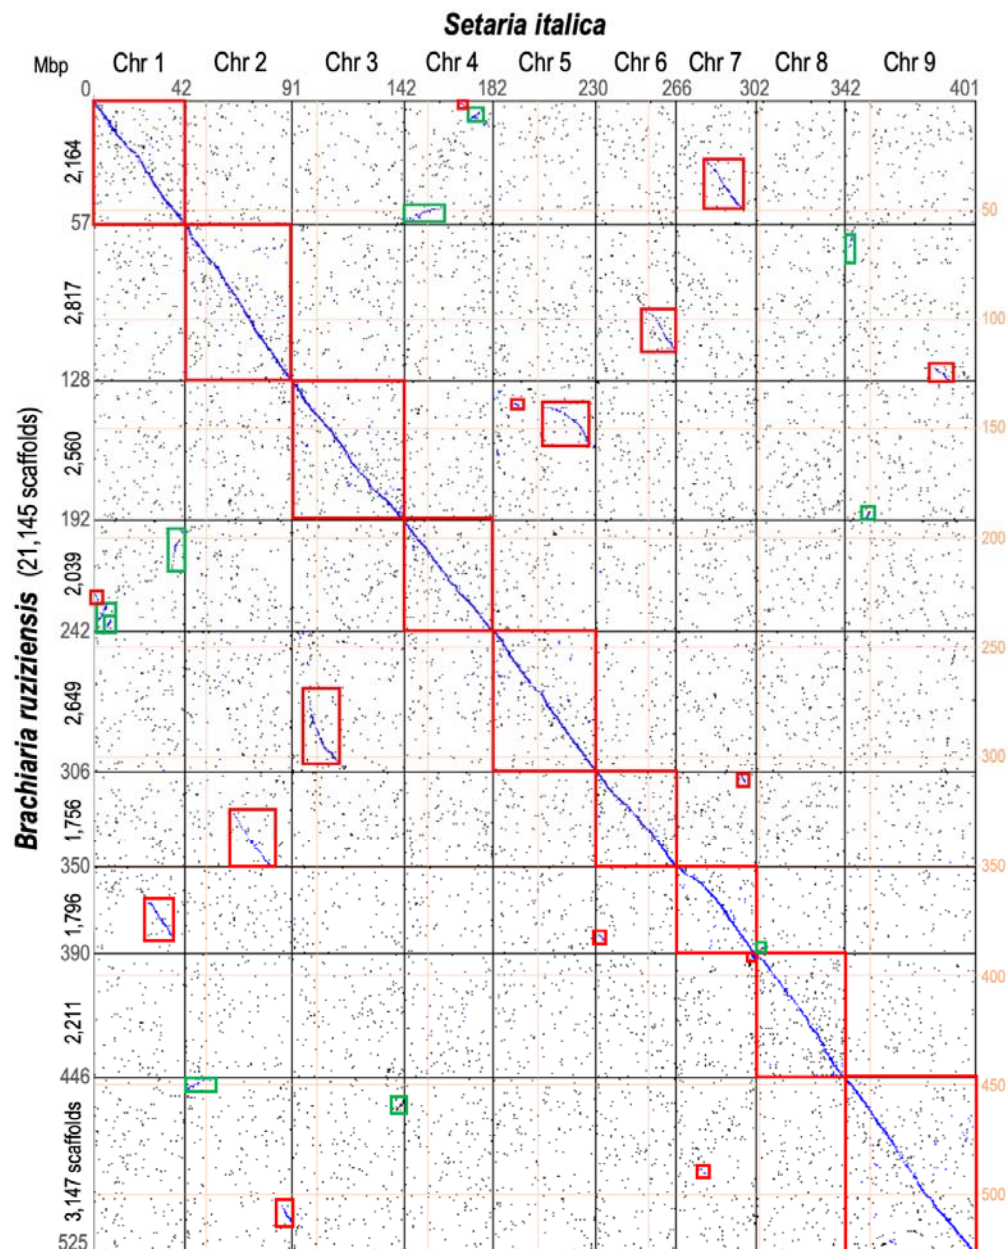

1006  
1007  
1008

1009 **Figure 4:** 4,427 genetic markers placed in 18 linkage groups. We defined three QTLs each  
1010 in LG 1 (Chr 8) for root length and biomass, LG 3 (Chr 7) for root length, and LG 4 (Chr 3)  
1011 for root diameter. As a control, the apomictic locus was identified from reproductive mode  
1012 phenotyping.

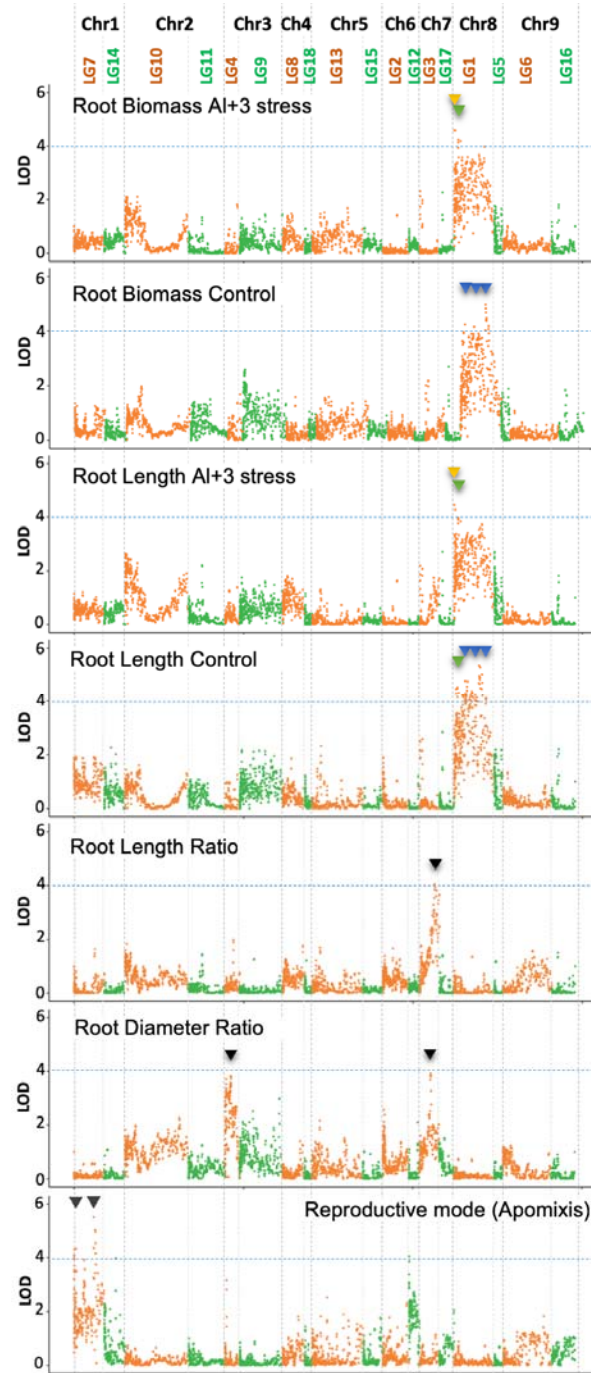

1013

1014 **Figure 5:** Differentially expressed (DE) genes in roots from the three accessions with  
1015 different levels of tolerance to high (200  $\mu\text{M}$   $\text{AlCl}_3$ ) aluminium cation concentrations.

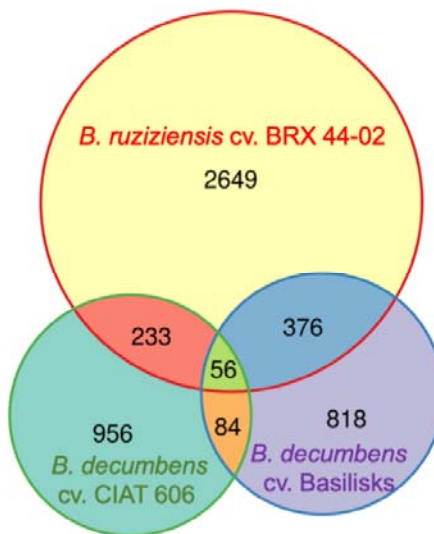

1016  
1017

1018 **Figure 6: Bubble plot of enriched GO terms.** Each bubble represents an overrepresented  
 1019 GO slim terms, in red if it is overrepresented among DE upregulated genes or in blue if  
 1020 among downregulated ones. The size is proportional to the number of DE genes that  
 1021 support that enrichment. The intensity of colour is proportional to the Pval of the enrichment  
 1022 test (Fisher test). Brachiaria species are sorted left to right from high to low aluminium-  
 1023 tolerance: Basi (*B. decumbens* cv. Basilisks), Bdec (*B. decumbens* cv. CIAT 606, Bruz (*B.*  
 1024 *ruzizensis* cv. BRX 44-02).  
 1025

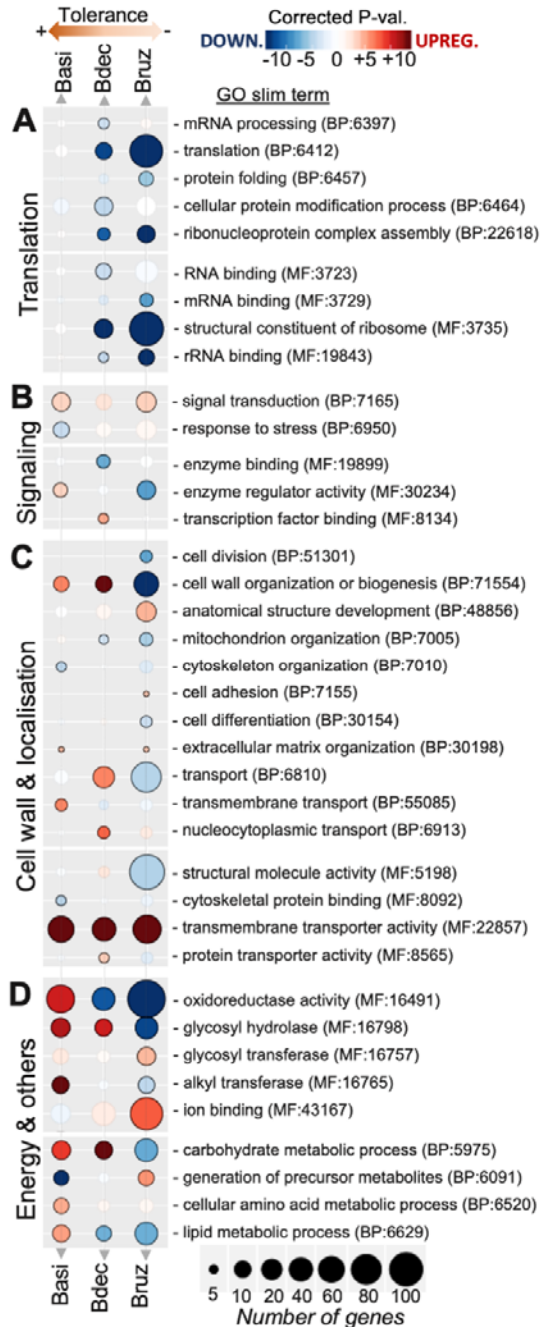

1026  
 1027

1028 **Table 1:** Statistics associated with the assembly of the *Brachiaria ruzizensis* reference  
1029 genome and anchored in pseudo-molecules..

|                         | <b>Whole genome assembly (WGA)</b> | <b>Pruned WGA*</b> | <b>Anchored assembly</b> |
|-------------------------|------------------------------------|--------------------|--------------------------|
| <b>Total length</b>     | 732.5 Mbp                          | 533.9 Mbp          | 525.1 Mbp                |
| <b>% Ns</b>             | 10.6 %                             | 11.7 %             | 12.18 %                  |
| <b>Number sequences</b> | 102,579                            | 23,076             | 7 pseudo-chrs            |
| <b>N50</b>              | 27.8 Kbp                           | 44.6 Kbp           | 55.9 Mbp                 |
| <b>N20</b>              | 76.1 Kbp                           | 91.7 Kbp           | 62.7 Mbp                 |
| <b>N80</b>              | 3.9 Kbp                            | 19.5 Kbp           | 44.1 Mbp                 |

1030 WGA deposited in NCBI, accession number GCA\_003016355. Anchoring available in AGP  
1031 format, together with the raw reads, in the Bioproject PRJNA437375. \*Sequences without  
1032 genes and under 10Kbp have been removed.



**Table 2:** *Brachiaria* genes differentially expressed during Al<sup>3+</sup> stress, homologous to Al-induced proteins or related Gene Ontology (GO) terms.

| GENE    | Bruz | Bdec  | Basi  | Gene name                             | Uniprot       | P. halli | S. italica | S. viridis | A. thaliana | Function and induction                                                                                                                                                                                                                                                                                                                        |
|---------|------|-------|-------|---------------------------------------|---------------|----------|------------|------------|-------------|-----------------------------------------------------------------------------------------------------------------------------------------------------------------------------------------------------------------------------------------------------------------------------------------------------------------------------------------------|
| 29G2    | 0.71 | 0.17  | -0.18 | STOP1                                 | STOP1_ORYSJ   | 3G044400 | 7G287100   | 7G299300   | AT1G34370   | Zinc-finger Transcription factor involved in aluminium tolerance                                                                                                                                                                                                                                                                              |
| 61G2    | 0.88 | 0.23  | 0.07  | Citrate transporter detoxification 42 | DTX42_ARATH   | 9G552400 | 9G489200   | 9G493200   | AT1G51340   | Citrate transporter responsible for citrate exudation into the rhizosphere to protect roots from aluminium toxicity. Upregulated by aluminium. Expressed in roots, but not in shoots.                                                                                                                                                         |
| 122G16  | 1.58 | 1.62  | 0.01  | Nitrate reductase                     | NIA3_MAIZE    | 6G233200 | 6G178500   | 6G184900   | AT1G77760   | Nitrate reductase                                                                                                                                                                                                                                                                                                                             |
| 126G26  | 1.83 | 0.95  | -0.11 | STOP1                                 | STOP1_ORYSJ   | 6G306100 | 6G252000   | 6G256600   | AT5G22890   | Transcription factor involved in aluminium tolerance                                                                                                                                                                                                                                                                                          |
| 211G30  | 0.20 | 0.00  | -0.81 | Tonoplast dicarboxylate               | TDT_ARATH     | 2G311500 | 2G251700   | 2G262500   | AT5G47560   | Carrier involved in the uptake of malate and fumarate to the vacuole. Inhibited by citrate. Critical for pH homeostasis. Induced by malate and by acidification of the cytoplasm.                                                                                                                                                             |
| 211G34  | 0.01 | 0.06  | -0.80 | Tonoplast dicarboxylate               | TDT_ARATH     | 2G311400 | 2G251700   | 2G262500   | AT5G47560   | Carrier involved in the uptake of malate and fumarate to the vacuole. Inhibited by citrate. Critical for pH homeostasis. Induced by malate and by acidification of the cytoplasm.                                                                                                                                                             |
| 259G14  | 2.36 | 1.43  | 0.10  | Citrate transporter protein detox. 42 | DTX42_ARATH   | 9G201000 | 9G204700   | 9G203100   | AT1G51340   | Citrate transporter responsible for citrate exudation into the rhizosphere to protect roots from aluminium toxicity. Upregulated by aluminium. Expressed in roots, but not in shoots.                                                                                                                                                         |
| 462G24  | 2.35 | 0.38  | 0.01  | AMLT10                                | K3XVN8_SETIT  | 4G147500 | 4G162600   | 4G130000   |             | Aluminium-activated malate transporter 10-like                                                                                                                                                                                                                                                                                                |
| 675G12  | 4.27 | 3.89  | 0.01  | Citrate transporter protein detox. 42 | DTX42_ARATH   | 5G042400 | 9G489200   | 9G493200   | AT1G51340   | Citrate transporter responsible for citrate exudation into the rhizosphere to protect roots from aluminium toxicity. Upregulated by aluminium. Expressed in roots, but not in shoots.                                                                                                                                                         |
| 1615G2  | 2.69 | 1.29  | 0.01  | STOP1                                 | STOP1_ORYSJ   | 6G306100 | 6G252000   | 6G256600   | AT5G22890   | Zinc-finger Transcription factor involved in aluminium tolerance                                                                                                                                                                                                                                                                              |
| 1766G4  | 1.34 | 0.96  | -0.24 | MST3                                  | MST3_ORYSJ    | 2G004500 | 2G000400   | 2G004300   | AT3G19930   | Involved in the accumulation of monosaccharides required for cell wall synthesis during root development. Highly expressed in in xylem and sclerenchyma cells of roots.                                                                                                                                                                       |
| 1984G2  | 1.09 | 0.82  | 0.09  | SLK2                                  | SLK2_ARATH    | 4G345700 | 4G015400   | 4G015300   | AT5G62090   | DNA-binding adapter subunit of the SEU-SLK2 transcriptional corepressor of abiotic stress (e.g. salt and osmotic stress) response genes by facilitating auxin response and sustaining meristematic potential.                                                                                                                                 |
| 2499G8  | 1.18 | -0.15 | 0.03  | OsTITANIA/AtOBE3                      | TTA1_ORYSJ    | 9G552000 | 9G488800   | 9G492800   | AT1G14740   | Widely expressed transcription factor that functions as regulator of metal transporter genes responsible for essential metals delivery to shoots and normal plant growth. Required for the maintenance of metal transporter gene expression, such as IRT1, IRT2, ZIP1, ZIP9, NRAMP1 and NRAMP5.                                               |
| 2708G4  | 1.64 | 1.94  | 0.42  | Auxin transport protein BIG           | BIG_ORYSJ     | 2G178200 | 2G154800   | 2G160200   | AT3G02260   | Auxin-mediated developmental responses (e.g. cell elongation, apical dominance, lateral root production, inflorescence architecture, general growth and development).                                                                                                                                                                         |
| 3096G6  | 0.51 | 0.27  | -0.04 | ALS1                                  | AB25B_ORYSJ   | 9G083700 | 9G088000   | 9G086400   | AT5G39040   | Metal transporter involved in the sequestration of aluminium into vacuoles, which is required for cellular detoxification of aluminium. Induced by aluminium in roots. Expressed in primary roots and lateral roots.                                                                                                                          |
| 3672G6  | 2.54 | 2.26  | -0.16 | NRAT1                                 | NRAT1_ORYSJ   | 1G025100 | 1G098100   | 1G097200   | AT1G80830   | Metal transporter Al <sup>3+</sup> , but not divalent cations Fe <sup>2+</sup> , Mg <sup>2+</sup> , Cd <sup>2+</sup> . Involved in Al tolerance by taking up Al in root cells, where it is detoxified by chelation with organic acid anions and sequestration into the vacuoles. Induced by aluminium in roots. Positively regulated by ART1. |
| 4534G2  | 4.74 | 0.43  | 0.08  | SAD2 importin beta-like transporter   | SAD2_ARATH    | 7G101600 | 7G051600   | 7G057300   | AT2G31660   | Involved in the regulation of the abscisic acid (ABA)-mediated pathway in response to cold or salt stress, UV-B responses. Involved in trichome initiation. Negative regulator miRNA activity. Expressed in roots, epidermal and guard cells of leaves, stems and silicles                                                                    |
| 5233G2  | 1.07 | 1.18  | -0.19 | XTH23                                 | XTH23_ARATH   | 4G029300 | 4G246200   | 4G258800   | AT4G25810   | Xyloglucan endotransglucosylase hydrolase protein 23 cleaves and religates xyloglucan polymers, an essential constituent of the primary cell wall, and thereby participates in cell wall construction of growing tissues. Upregulated by abscisic acid (ABA).                                                                                 |
| 5400G2  | 1.38 | -0.05 | 0.08  | XTH                                   | XTH5_ARATH    | 8G197800 | 8G142000   | 8G151900   | AT5G13870   | Cleaves and religates xyloglucan polymers, an essential constituent of the primary cell wall, and thereby participates in cell wall construction of growing tissues. Strongly down regulated by abscisic acid. Root specific.                                                                                                                 |
| 6544G2  | 0.07 | 0.95  | -0.04 | XTH32                                 | XTH8_ORYSJ    | 2G372300 | 2G313800   | 2G324800   | AT2G36870   | Xyloglucan endotransglucosylase hydrolase protein 32 cleaves and religates xyloglucan polymers, an essential constituent of the primary cell wall, and thereby participates in cell wall construction of growing tissues. May be involved in cell elongation processes. Induced by gibberellic acid (GA <sub>3</sub> ).                       |
| 6944G2  | 1.92 | 2.01  | 0.02  | Phospholipid transporting ATPase      | ALA12_ARATH   | 4G247400 | 4G147300   | 4G165700   | AT1G26130   | Involved in transport of phospholipids.                                                                                                                                                                                                                                                                                                       |
| 7361G2  | 2.26 | 1.39  | 0.00  | STAR2/ALS3                            | STAR2_ORYSJ   | 3G099200 | 3G043600   | 3G044400   | AT2G37330   | Associates with STAR2 to form a functional transmembrane ABC transporter required for detoxification of aluminium (Al) in roots. Can specifically transport UDP-glucose. Induced by Al in roots. Positively regulated by ART1. Root specific.                                                                                                 |
| 7811G2  | 0.68 | 0.86  | 0.06  | Germin-like protein 5-1               | GL52_ORYSJ    | 5G433600 | 5G062400   | 5G061900   | AT3G62020   | Manganese metal-binding intracellular transporter involved in root development. May play a role in plant defense. Probably has no oxalate oxidase activity.                                                                                                                                                                                   |
| 8068G4  | 2.77 | 2.12  | 0.01  | Mg transporter MRS2-D                 | MRS2D_ORYSJ   | 7G150800 | 7G099600   | 7G107500   | AT3G19640   | Putative magnesium transporter.                                                                                                                                                                                                                                                                                                               |
| 8448G4  | 0.59 | 1.26  | -0.24 | STAR1                                 | STAR1_ORYSJ   | 4G029500 | 4G246800   | 4G259400   | AT1G67940   | Associates with STAR2 to form a functional transmembrane ABC transporter required for detoxification of aluminium (Al) in roots. Can specifically transport UDP-glucose. Induced by Al in roots. Positively regulated by ART1. Root specific.                                                                                                 |
| 11634G4 | 0.04 | 4.75  | -0.01 | AMLT1                                 | ALMT8_ARATH   | 7G143300 | 7G007400   | 7G102000   | AT3G11680   | Malate transporter.                                                                                                                                                                                                                                                                                                                           |
| 11683G4 | 1.00 | 0.66  | 0.00  | XTH27                                 | A0A1D6K9K3_ZM |          |            |            |             | Xyloglucan endotransglucosylase hydrolase protein 27 cleaves and religates xyloglucan polymers, an essential constituent of the primary cell wall, and thereby participates in cell wall construction of growing tissues.                                                                                                                     |
| 12087G2 | 1.31 | 3.21  | -0.03 | Phosphate transporter pho1-2          | PHO12_ORYSJ   | 1G440700 | 1G360400   | 1G367100   | AT3G23430   | Involved in the transfer of inorganic phosphate (Pi) from roots to shoots. Not induced by Pi deficiency in roots. Specifically expressed in roots.                                                                                                                                                                                            |
| 14972G2 | 0.56 | 0.96  | 0.13  | GTP-binding nuclear protein RAN2      | RAN2_ORYSJ    | 5G226400 | 5G244500   | 5G252400   | AT5G20010   | GTP-binding protein involved in nucleocytoplasmic transport. Required for the import of protein into the nucleus and also for RNA export. Involved in chromatin condensation and control of cell cycle.                                                                                                                                       |
| 26018G2 | 1.08 | 0.98  | -0.22 | transporter NRT1 nitrate transporter  | PTR27_ARATH   | 9G390400 | 9G327900   | 9G333900   | AT2G26690   | Low-affinity proton-dependent nitrate transporter. Upregulated in the shoots by nitrate, but no changes in the roots.                                                                                                                                                                                                                         |
| 30107G2 | 3.24 | 3.02  | -0.01 | NRAT1                                 | NRAT1_ORYSJ   | 2G074500 | 1G098100   | 1G097200   | AT1G80830   | Metal transporter Al <sup>3+</sup> , but not divalent cations Fe <sup>2+</sup> , Mg <sup>2+</sup> , Cd <sup>2+</sup> . Involved in Al tolerance by taking up Al in root cells, where it is detoxified by chelation with organic acid anions and sequestration into the vacuoles. Induced by aluminium in roots. Positively regulated by ART1. |
| 87018G2 | 3.19 | 2.16  | -0.05 | ABC transporter C family member 9     | AB4C_MAIZE    | 7G270200 | 7G216700   | 7G228400   | AT3G60160   | ABC transporter that may affect phytic acid transport and compartmentalization. May function directly or indirectly in removing phytic acid from the cytosol or in vesicle trafficking. Expressed in roots, leaves, stalks, tassels, silks, developing seeds and embryos.                                                                     |
| 89122G2 | 3.41 | 1.40  | 0.02  | ABC transporter C family member 15    | AB4C_MAIZE    | 7G270200 | 7G216700   | 7G228400   | AT3G60160   | ABC transporter that may affect phytic acid transport and compartmentalization. May function directly or indirectly in removing phytic acid from the cytosol or in vesicle trafficking. Expressed in roots, leaves, stalks, tassels, silks, developing seeds and embryos.                                                                     |
